# Supplementary material for: Quantum chemical modeling of magnetically bistable metal coordination compounds. Synchronization of spin crossover, valence tautomerism and charge transfer induced spin transition mechanisms
Source: Royal Society of Chemistry journal article supplement (doi:10.1039/c6dt01687a), 2016-01-01
Supplement: c6dt01687a1.pdf [file c6dt01687a1.pdf]

## **Electronic Supplementary Information**

**Quantum chemical modeling of magnetically bistable metal coordination compounds.  
Synchronization of spin crossover, valence tautomerism and charge transfer induced spin  
transition mechanisms**

**Vladimir I. Minkin\*, Alyona A. Starikova and Andrey G. Starikov**

**Table S1.** Spin states (S), total energies without (E, given in a.u.) and with account ( $E^{ZPE}$ , given in a.u.) taken for energies of zero harmonic vibrations, relative energies without ( $\Delta E$ , given in kcal mol<sup>-1</sup>) and with ( $\Delta E^{ZPE}$ , given in kcal mol<sup>-1</sup>) taking into account the energies of zero harmonic vibrations of the low-spin (LS) and the high-spin (HS) isomers of 1,10-phenanthroline-dihydrobis(pyrazolyl)borate Fe<sup>II</sup> (phen Fe<sup>II</sup>) and 1,10-phenanthroline-5,6-dione-dihydrobis(pyrazolyl)borate Fe<sup>II</sup> (phendione Fe<sup>II</sup>) calculated by the DFT method.

| Structure                     | S   | E           | $\Delta E$ | $E^{ZPE}$   | $\Delta E^{ZPE}$ |
|-------------------------------|-----|-------------|------------|-------------|------------------|
| <b>B3LYP*</b>                 |     |             |            |             |                  |
| phen Fe <sup>II</sup> LS      | 0   | -2789.36694 |            | -2788.90053 |                  |
| phen Fe <sup>II</sup> HS      | 4/2 | -2789.36050 | 4.0        | -2788.89831 | 1.4              |
| phendione Fe <sup>II</sup> LS | 0   | -2938.56180 |            | -2938.11032 |                  |
| phendione Fe <sup>II</sup> HS | 4/2 | -2938.55515 | 4.2        | -2938.10762 | 1.7              |
| <b>TPSSh</b>                  |     |             |            |             |                  |
| phen Fe <sup>II</sup> LS      | 0   | -2790.62692 |            | -2790.15820 |                  |
| phen Fe <sup>II</sup> HS      | 4/2 | -2790.61050 | 10.3       | -2790.14619 | 7.5              |
| phendione Fe <sup>II</sup> LS | 0   | -2939.88695 |            | -2939.43307 |                  |
| phendione Fe <sup>II</sup> HS | 4/2 | -2939.87016 | 10.5       | -2939.42087 | 7.7              |
| <b>OLYP</b>                   |     |             |            |             |                  |
| phen Fe <sup>II</sup> LS      | 0   | -2790.19362 |            | -2789.73281 |                  |
| phen Fe <sup>II</sup> HS      | 4/2 | -2790.19815 | -2.8       | -2789.74134 | -5.4             |
| phendione Fe <sup>II</sup> LS | 0   | -2939.43084 |            | -2938.98520 |                  |
| phendione Fe <sup>II</sup> HS | 4/2 | -2939.43745 | -4.1       | -2938.99548 | -6.4             |

**Table S2.** Total energies without (E) and with ( $E^{ZPE}$ ) taking into account the energies of zero harmonic vibrations (all energy values are given in a.u.) of the structures of Co<sup>II</sup> bis-chelates calculated by the DFT B3LYP\*/6-311++G(d,p) method.

| Structure                                                                  | E           | $E^{ZPE}$   |
|----------------------------------------------------------------------------|-------------|-------------|
| <i>bis</i> -(acetylacetonate)Co <sup>II</sup>                              | -2072.89123 | -2072.66825 |
| <i>bis</i> -(trifluoroacetylacetonate)Co <sup>II</sup>                     | -2668.26938 | -2668.09245 |
| <i>bis</i> -(hexafluoroacetylacetonate)Co <sup>II</sup>                    | -3263.63635 | -3263.50515 |
| <i>bis</i> -(N-phenylsalicylaldiminate)Co <sup>II</sup>                    | -2644.95127 | -2644.56118 |
| <i>bis</i> -(N-( <i>p</i> -nitrophenyl)-salicylaldiminate)Co <sup>II</sup> | -3053.90136 | -3053.50641 |

**Table S3.** Spin states (S), total energies without (E, given in a.u.) and with ( $E^{ZPE}$ , given in a.u.) taking into account the energies of zero harmonic vibrations, expectation values of the spin-squared ( $S^2$ ) operator of the electromeric forms in the ground state and broken symmetry (BS) states and values of the lowest frequencies ( $\omega_1$ ,  $\text{cm}^{-1}$ ) of the adducts **5** ( $R_1, R_2 = \text{CH}_3, \text{CF}_3$ ) and **6** ( $R = \text{Ph}, \text{Ph-}p\text{-NO}_2$ ) calculated by the DFT B3LYP\*/6-311++G(d,p) method.

| Structure                                             |                                                                                      | S   | E           | $E^{ZPE}$   | $S^2$ | $\omega_1$ |
|-------------------------------------------------------|--------------------------------------------------------------------------------------|-----|-------------|-------------|-------|------------|
| <b>5</b> , $R_1 = \text{CH}_3$<br>$R_2 = \text{CH}_3$ | $_{\text{LS}}\text{Co}^{\text{III}}\text{-SQ-}_{\text{LS}}\text{Fe}^{\text{II}}$     | 1/2 | -5011.47930 | -5010.80072 | 0.76  | 16         |
|                                                       | $_{\text{LS}}\text{Co}^{\text{III}}\text{-SQ-}_{\text{HS}}\text{Fe}^{\text{II}}$     | 5/2 | -5011.47297 | -5010.79881 | 8.77  | 11         |
|                                                       | BS $_{\text{LS}}\text{Co}^{\text{III}}\text{-SQ-}_{\text{HS}}\text{Fe}^{\text{II}}$  |     | -5011.47302 |             | 4.77  |            |
|                                                       | $_{\text{HS}}\text{Co}^{\text{II}}\text{-BQ-}_{\text{LS}}\text{Fe}^{\text{II}}$      | 3/2 | -5011.45911 | -5010.78429 | 4.13  | 13         |
|                                                       | $_{\text{HS}}\text{Co}^{\text{II}}\text{-BQ-}_{\text{HS}}\text{Fe}^{\text{II}}$      | 7/2 | -5011.45242 | -5010.78190 | 16.21 | 11         |
|                                                       | BS $_{\text{HS}}\text{Co}^{\text{II}}\text{-BQ-}_{\text{HS}}\text{Fe}^{\text{II}}$   |     | -5011.45257 |             | 4.21  |            |
| <b>5</b> , $R_1 = \text{CH}_3$<br>$R_2 = \text{CF}_3$ | $_{\text{LS}}\text{Co}^{\text{III}}\text{-SQ-}_{\text{LS}}\text{Fe}^{\text{II}}$     | 1/2 | -5606.85491 | -5606.22205 | 0.76  | 11         |
|                                                       | $_{\text{LS}}\text{Co}^{\text{III}}\text{-SQ-}_{\text{HS}}\text{Fe}^{\text{II}}$     | 5/2 | -5606.84901 | -5606.22032 | 8.79  | 10         |
|                                                       | BS $_{\text{LS}}\text{Co}^{\text{III}}\text{-SQ-}_{\text{HS}}\text{Fe}^{\text{II}}$  |     | -5606.84838 |             | 4.80  |            |
|                                                       | $_{\text{HS}}\text{Co}^{\text{II}}\text{-BQ-}_{\text{LS}}\text{Fe}^{\text{II}}$      | 3/2 | -5606.84393 | -5606.21505 | 3.89  | 8          |
|                                                       | $_{\text{HS}}\text{Co}^{\text{II}}\text{-BQ-}_{\text{HS}}\text{Fe}^{\text{II}}$      | 7/2 | -5606.83786 | -5606.21299 | 16.10 | 6          |
|                                                       | BS $_{\text{HS}}\text{Co}^{\text{II}}\text{-BQ-}_{\text{HS}}\text{Fe}^{\text{II}}$   |     | -5606.83845 |             | 4.13  |            |
|                                                       | MECP <sub>2-4</sub>                                                                  |     | -5606.83714 |             |       |            |
|                                                       | MECP <sub>6-8</sub>                                                                  |     | -5606.83123 |             |       |            |
|                                                       | MECP <sub>4-6</sub>                                                                  |     | -5606.83539 |             |       |            |
|                                                       | MECP <sub>2-8</sub>                                                                  |     | -5606.82627 |             |       |            |
| <b>5</b> , $R_1 = \text{CF}_3$<br>$R_2 = \text{CF}_3$ | $_{\text{LS}}\text{Co}^{\text{III}}\text{-SQ-}_{\text{LS}}\text{Fe}^{\text{II}}$     | 1/2 | -6202.22208 | -6201.63560 | 0.79  | 9          |
|                                                       | $_{\text{LS}}\text{Co}^{\text{III}}\text{-SQ-}_{\text{HS}}\text{Fe}^{\text{II}}$     | 5/2 | -6202.21702 | -6201.63381 | 8.79  | 9          |
|                                                       | BS $_{\text{LS}}\text{Co}^{\text{III}}\text{-SQ-}_{\text{HS}}\text{Fe}^{\text{II}}$  |     | -6202.21438 |             | 4.81  |            |
|                                                       | $_{\text{HS}}\text{Co}^{\text{II}}\text{-SQ-}_{\text{LS}}\text{Fe}^{\text{III}}$     | 5/2 | -6202.22567 | -6201.64213 | 8.79  | 6          |
|                                                       | BS1 $_{\text{HS}}\text{Co}^{\text{II}}\text{-SQ-}_{\text{LS}}\text{Fe}^{\text{III}}$ |     | -6202.22564 |             | 4.79  |            |
|                                                       | BS2 $_{\text{HS}}\text{Co}^{\text{II}}\text{-SQ-}_{\text{LS}}\text{Fe}^{\text{III}}$ |     | -6202.22254 |             | 4.79  |            |
|                                                       | BS3 $_{\text{HS}}\text{Co}^{\text{II}}\text{-SQ-}_{\text{LS}}\text{Fe}^{\text{III}}$ |     | -6202.22254 |             | 2.78  |            |
|                                                       | $_{\text{HS}}\text{Co}^{\text{II}}\text{-BQ-}_{\text{HS}}\text{Fe}^{\text{II}}$      | 7/2 | -6202.21727 | -6201.63780 | 16.17 | 6          |
|                                                       | BS $_{\text{HS}}\text{Co}^{\text{II}}\text{-BQ-}_{\text{HS}}\text{Fe}^{\text{II}}$   |     | -6202.21824 |             | 4.23  |            |
| <b>6</b> , $R = \text{Ph}$                            | $_{\text{LS}}\text{Co}^{\text{III}}\text{-SQ-}_{\text{LS}}\text{Fe}^{\text{II}}$     | 1/2 | -5583.55901 | -5582.71262 | 0.76  | 9          |
|                                                       | $_{\text{LS}}\text{Co}^{\text{III}}\text{-SQ-}_{\text{HS}}\text{Fe}^{\text{II}}$     | 5/2 | -5583.55286 | -5582.71079 | 8.79  | 4          |
|                                                       | BS $_{\text{LS}}\text{Co}^{\text{III}}\text{-SQ-}_{\text{HS}}\text{Fe}^{\text{II}}$  |     | -5583.55285 |             | 4.80  |            |
|                                                       | $_{\text{HS}}\text{Co}^{\text{II}}\text{-BQ-}_{\text{LS}}\text{Fe}^{\text{II}}$      | 3/2 | -5583.53789 | -5582.69540 | 4.38  | 8          |
|                                                       | $_{\text{HS}}\text{Co}^{\text{II}}\text{-BQ-}_{\text{HS}}\text{Fe}^{\text{II}}$      | 7/2 | -5583.53140 | -5582.69340 | 16.44 | 9          |
|                                                       | BS $_{\text{HS}}\text{Co}^{\text{II}}\text{-BQ-}_{\text{HS}}\text{Fe}^{\text{II}}$   |     | -5583.53160 |             | 4.42  |            |
| <b>6</b> , $R = \text{Ph-}p\text{-NO}_2$              | $_{\text{LS}}\text{Co}^{\text{III}}\text{-SQ-}_{\text{LS}}\text{Fe}^{\text{II}}$     | 1/2 | -5992.49433 | -5991.64349 | 0.76  | 10         |
|                                                       | $_{\text{LS}}\text{Co}^{\text{III}}\text{-SQ-}_{\text{HS}}\text{Fe}^{\text{II}}$     | 5/2 | -5992.48834 | -5991.64169 | 8.79  | 6          |
|                                                       | BS $_{\text{LS}}\text{Co}^{\text{III}}\text{-SQ-}_{\text{HS}}\text{Fe}^{\text{II}}$  |     | -5992.48723 |             | 4.81  |            |
|                                                       | $_{\text{HS}}\text{Co}^{\text{II}}\text{-SQ-}_{\text{LS}}\text{Fe}^{\text{III}}$     | 5/2 | -5992.47886 | -5991.63174 | 8.79  | 7          |
|                                                       | BS1 $_{\text{HS}}\text{Co}^{\text{II}}\text{-SQ-}_{\text{LS}}\text{Fe}^{\text{III}}$ |     | -5992.47884 |             | 4.79  |            |
|                                                       | BS2 $_{\text{HS}}\text{Co}^{\text{II}}\text{-SQ-}_{\text{LS}}\text{Fe}^{\text{III}}$ |     | -5992.47203 |             | 4.79  |            |
|                                                       | BS3 $_{\text{HS}}\text{Co}^{\text{II}}\text{-SQ-}_{\text{LS}}\text{Fe}^{\text{III}}$ |     | -5992.47203 |             | 2.79  |            |
|                                                       | $_{\text{HS}}\text{Co}^{\text{II}}\text{-BQ-}_{\text{HS}}\text{Fe}^{\text{II}}$      | 7/2 | -5992.47081 | -5991.62821 | 16.29 | 4          |
|                                                       | BS $_{\text{HS}}\text{Co}^{\text{II}}\text{-BQ-}_{\text{HS}}\text{Fe}^{\text{II}}$   |     | -5992.47146 |             | 4.24  |            |

<sup>a</sup> BS1 corresponds to spin orientation  $\alpha\alpha\beta$ , BS2 corresponds to spin orientation  $\alpha\beta\alpha$ , BS3 corresponds to spin orientation  $\beta\alpha\alpha$ , where  $\alpha$  – spin up,  $\beta$  – spin down.

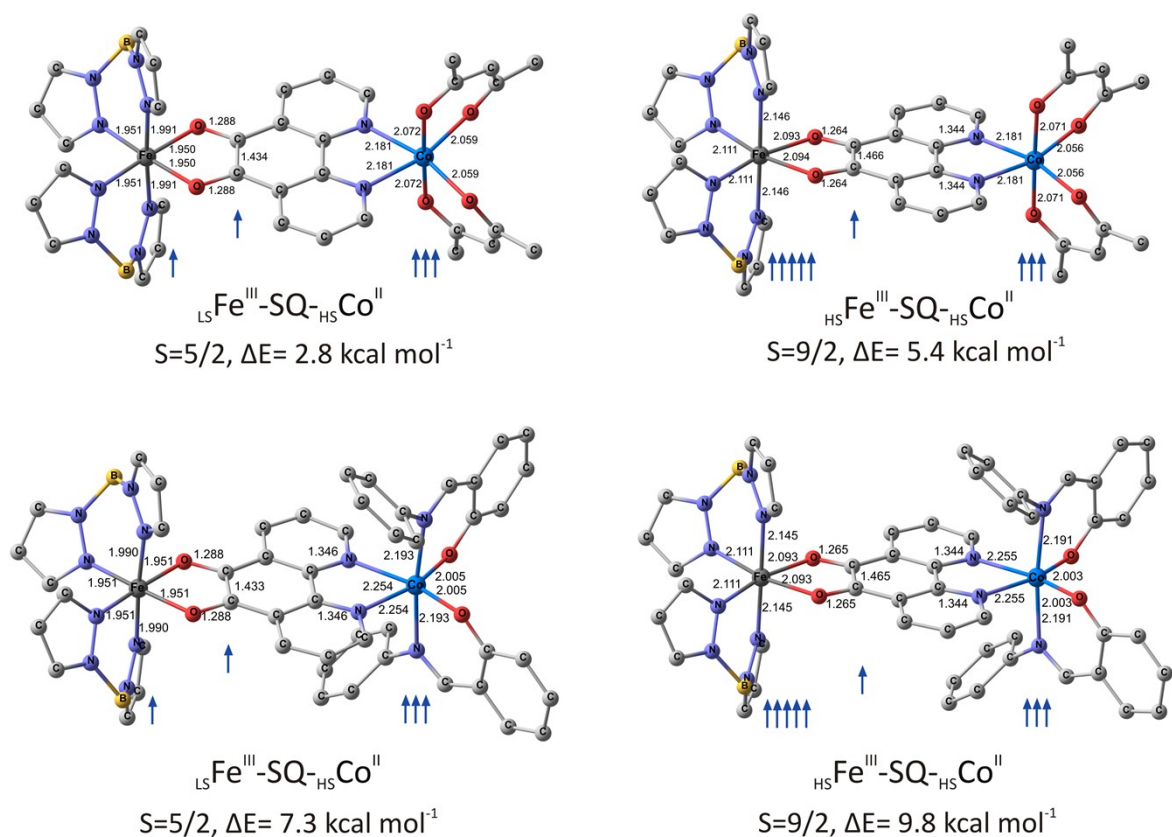

**Figure S1.** Geometry and energy characteristics of linkage isomers of the adducts **5** ( $R_1=R_2=\text{CH}_3$ ) and **6** ( $R=\text{Ph}$ ) calculated by the DFT B3LYP\*/6-311++G(d,p) method.  $\Delta E$  values are calculated relative to the most energy preferred electromeric forms of adducts **5** ( $R_1=R_2=\text{CH}_3$ ) and **6** ( $R=\text{Ph}$ ).

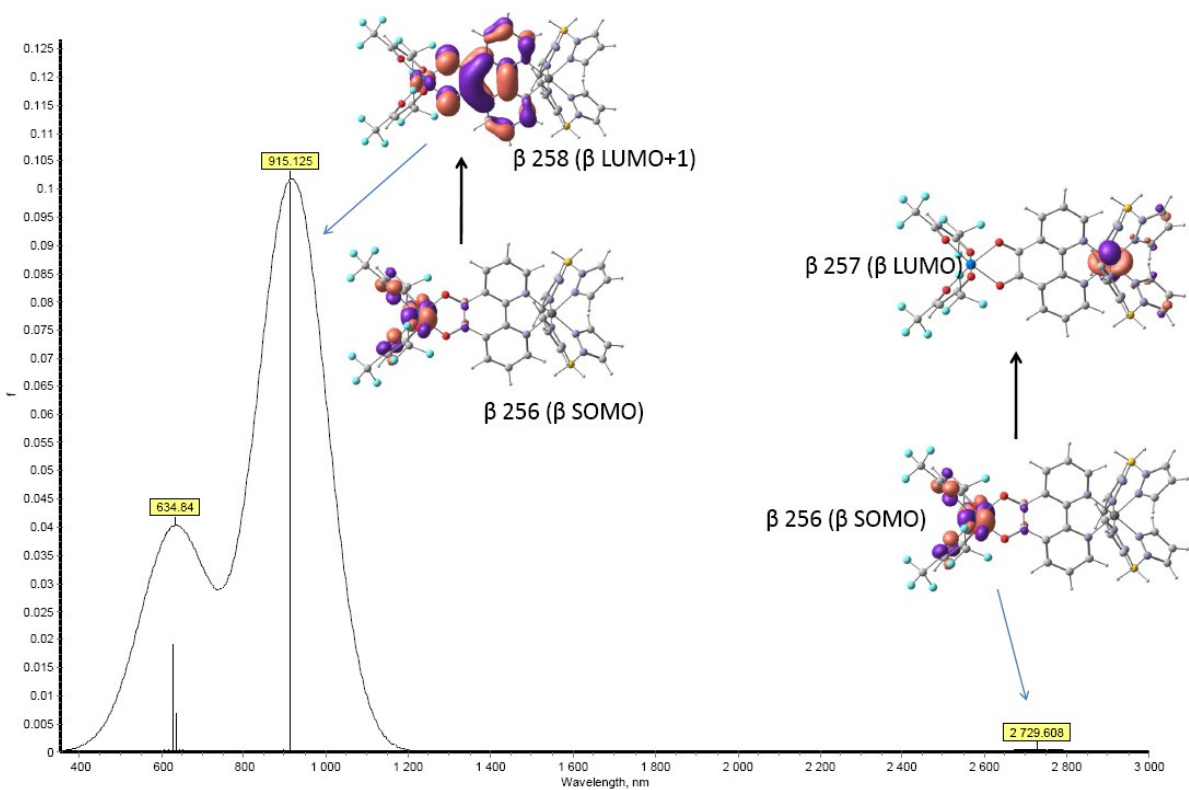

**Figure S2.** TD-DFT spectrum and the orbitals contributed to the long wave length absorption bands of  ${}_{\text{HS}}\text{Co}^{\text{II}}\text{-SQ-}{}_{\text{LS}}\text{Fe}^{\text{III}}$  electromer of adduct **5** ( $R_1=R_2=\text{CF}_3$ ).

**Total energies and optimized geometries of the electromeric forms of the adducts 5 (R<sub>1</sub>, R<sub>2</sub> = CH<sub>3</sub>, CF<sub>3</sub>) and 6 (R=Ph, Ph-*p*-NO<sub>2</sub>) calculated by DFT B3LYP\*/6-311++G(d,p)**

LSCo<sup>III</sup>-SQ-LSFe<sup>II</sup>, 5 (R<sub>1</sub>= CH<sub>3</sub>, R<sub>2</sub>=CH<sub>3</sub>)

E= -5011.47930 a.u., E<sup>ZPE</sup>= -5010.80072 a.u.

|    |              |              |              |
|----|--------------|--------------|--------------|
| 26 | 3.214329000  | -0.000006000 | -0.000002000 |
| 7  | 3.217102000  | -1.714585000 | 1.107415000  |
| 7  | 3.756463000  | -2.898792000 | 0.710058000  |
| 7  | 5.034223000  | -2.039308000 | -1.298309000 |
| 7  | 4.677038000  | -0.727027000 | -1.199258000 |
| 7  | 4.677027000  | 0.727057000  | 1.199239000  |
| 7  | 5.034150000  | 2.039351000  | 1.298315000  |
| 7  | 3.756348000  | 2.898804000  | -0.710034000 |
| 7  | 3.217040000  | 1.714580000  | -1.107410000 |
| 5  | 4.172330000  | -3.214046000 | -0.756313000 |
| 1  | 3.179362000  | -3.366924000 | -1.432238000 |
| 1  | 4.854869000  | -4.208060000 | -0.747411000 |
| 5  | 4.172199000  | 3.214057000  | 0.756342000  |
| 1  | 3.179223000  | 3.366869000  | 1.432271000  |
| 1  | 4.854687000  | 4.208105000  | 0.747458000  |
| 6  | 2.843600000  | -1.876931000 | 2.389988000  |
| 1  | 2.411362000  | -1.061252000 | 2.946545000  |
| 6  | 3.134504000  | -3.171950000 | 2.829260000  |
| 1  | 2.957131000  | -3.595029000 | 3.806076000  |
| 6  | 3.716204000  | -3.783975000 | 1.726996000  |
| 1  | 4.097892000  | -4.784406000 | 1.588531000  |
| 6  | 6.176671000  | -2.144856000 | -2.009417000 |
| 1  | 6.611632000  | -3.115876000 | -2.193435000 |
| 6  | 6.586667000  | -0.873505000 | -2.388054000 |
| 1  | 7.462384000  | -0.603093000 | -2.957824000 |
| 6  | 5.619164000  | -0.020002000 | -1.848275000 |
| 1  | 5.565854000  | 1.056908000  | -1.881133000 |
| 6  | 5.619188000  | 0.020061000  | 1.848237000  |
| 1  | 5.565924000  | -1.056852000 | 1.881080000  |
| 6  | 6.586665000  | 0.873598000  | 2.388011000  |
| 1  | 7.462403000  | 0.603214000  | 2.957762000  |
| 6  | 6.176606000  | 2.144938000  | 2.009404000  |
| 1  | 6.611527000  | 3.115974000  | 2.193432000  |
| 6  | 3.716058000  | 3.783999000  | -1.726962000 |
| 1  | 4.097703000  | 4.784444000  | -1.588483000 |
| 6  | 3.134387000  | 3.171963000  | -2.829236000 |
| 1  | 2.956998000  | 3.595047000  | -3.806046000 |
| 6  | 2.843534000  | 1.876927000  | -2.389982000 |
| 1  | 2.411333000  | 1.061236000  | -2.946550000 |
| 8  | -3.122946000 | 0.680231000  | 1.118300000  |

|    |              |              |              |
|----|--------------|--------------|--------------|
| 8  | -3.122938000 | -0.680192000 | -1.118372000 |
| 6  | -1.982124000 | 0.371642000  | 0.617623000  |
| 6  | -1.982119000 | -0.371624000 | -0.617675000 |
| 6  | -0.658478000 | 1.448568000  | 2.458131000  |
| 6  | 0.591677000  | 1.740601000  | 2.975975000  |
| 6  | -0.732484000 | 0.741557000  | 1.246344000  |
| 6  | 1.742538000  | 1.340244000  | 2.285435000  |
| 6  | 0.475049000  | 0.371417000  | 0.617480000  |
| 7  | 1.696817000  | 0.673960000  | 1.123852000  |
| 6  | -0.732476000 | -0.741556000 | -1.246379000 |
| 6  | 0.475053000  | -0.371429000 | -0.617502000 |
| 1  | -1.573396000 | 1.742989000  | 2.960970000  |
| 1  | 0.700337000  | 2.282539000  | 3.909222000  |
| 1  | 2.730545000  | 1.554566000  | 2.670572000  |
| 6  | -0.658464000 | -1.448578000 | -2.458159000 |
| 7  | 1.696824000  | -0.673994000 | -1.123852000 |
| 6  | 1.742552000  | -1.340288000 | -2.285430000 |
| 6  | 0.591694000  | -1.740634000 | -2.975983000 |
| 1  | -1.573380000 | -1.742988000 | -2.961009000 |
| 1  | 2.730559000  | -1.554622000 | -2.670556000 |
| 1  | 0.700359000  | -2.282579000 | -3.909225000 |
| 27 | -4.548130000 | -0.000010000 | -0.000028000 |
| 8  | -4.461602000 | -1.608836000 | 1.005220000  |
| 8  | -5.878061000 | -0.596831000 | -1.195489000 |
| 8  | -5.878087000 | 0.596741000  | 1.195439000  |
| 8  | -4.461674000 | 1.608824000  | -1.005269000 |
| 6  | -5.202765000 | -2.625227000 | 0.808375000  |
| 6  | -6.173211000 | -2.741301000 | -0.198881000 |
| 6  | -6.445570000 | -1.739164000 | -1.138233000 |
| 6  | -6.445478000 | 1.739141000  | 1.138338000  |
| 6  | -6.173142000 | 2.741310000  | 0.199012000  |
| 6  | -5.202835000 | 2.625206000  | -0.808373000 |
| 1  | -6.735014000 | -3.664403000 | -0.261444000 |
| 1  | -6.734878000 | 3.664446000  | 0.261677000  |
| 6  | -4.966667000 | -3.768309000 | 1.766202000  |
| 1  | -5.614993000 | -4.621366000 | 1.557915000  |
| 1  | -3.919990000 | -4.083481000 | 1.703062000  |
| 1  | -5.139779000 | -3.420883000 | 2.790040000  |
| 6  | -7.487127000 | -1.966697000 | -2.207887000 |
| 1  | -7.020959000 | -1.861489000 | -3.192998000 |
| 1  | -7.948754000 | -2.952614000 | -2.129102000 |
| 1  | -8.260656000 | -1.195537000 | -2.130898000 |
| 6  | -4.966914000 | 3.768234000  | -1.766308000 |
| 1  | -3.920187000 | 4.083302000  | -1.703515000 |
| 1  | -5.140387000 | 3.420782000  | -2.790078000 |
| 1  | -5.615097000 | 4.621360000  | -1.557859000 |

|   |              |             |             |
|---|--------------|-------------|-------------|
| 6 | -7.486877000 | 1.966708000 | 2.208140000 |
| 1 | -8.260620000 | 1.195773000 | 2.131034000 |
| 1 | -7.020655000 | 1.861144000 | 3.193185000 |
| 1 | -7.948257000 | 2.952761000 | 2.129613000 |

$\text{LSCo}^{\text{III}}\text{-SQ-HsFe}^{\text{II}}$ , **5** ( $\text{R}_1 = \text{CH}_3$ ,  $\text{R}_2 = \text{CH}_3$ )

$E = -5011.47297$  a.u.,  $E^{\text{ZPE}} = -5010.79881$  a.u.

|    |              |              |              |
|----|--------------|--------------|--------------|
| 26 | -3.401940000 | -0.004867000 | -0.004513000 |
| 7  | -3.396641000 | 1.823345000  | 1.251906000  |
| 7  | -3.882967000 | 3.026334000  | 0.840416000  |
| 7  | -5.127176000 | 2.297692000  | -1.267918000 |
| 7  | -4.829881000 | 0.967176000  | -1.314066000 |
| 7  | -4.841407000 | -0.951021000 | 1.316347000  |
| 7  | -5.162281000 | -2.276218000 | 1.269683000  |
| 7  | -3.925542000 | -3.026045000 | -0.835221000 |
| 7  | -3.416915000 | -1.831982000 | -1.246692000 |
| 5  | -4.163054000 | 3.362689000  | -0.657012000 |
| 1  | -3.118978000 | 3.366704000  | -1.268981000 |
| 1  | -4.718453000 | 4.432239000  | -0.700422000 |
| 5  | -4.213667000 | -3.355869000 | 0.662848000  |
| 1  | -3.170103000 | -3.373257000 | 1.275779000  |
| 1  | -4.783504000 | -4.417796000 | 0.706435000  |
| 6  | -3.168815000 | 1.935836000  | 2.571779000  |
| 1  | -2.793078000 | 1.092412000  | 3.132772000  |
| 6  | -3.499573000 | 3.216922000  | 3.025704000  |
| 1  | -3.427921000 | 3.607614000  | 4.029414000  |
| 6  | -3.954016000 | 3.873515000  | 1.886418000  |
| 1  | -4.318062000 | 4.880841000  | 1.748137000  |
| 6  | -6.278923000 | 2.525168000  | -1.928226000 |
| 1  | -6.670879000 | 3.528472000  | -2.007218000 |
| 6  | -6.762781000 | 1.316447000  | -2.420361000 |
| 1  | -7.664737000 | 1.148666000  | -2.988920000 |
| 6  | -5.821397000 | 0.372113000  | -2.002578000 |
| 1  | -5.806799000 | -0.697833000 | -2.152973000 |
| 6  | -5.824572000 | -0.339349000 | 2.002067000  |
| 1  | -5.791786000 | 0.730081000  | 2.153023000  |
| 6  | -6.784051000 | -1.267016000 | 2.416822000  |
| 1  | -7.684774000 | -1.083391000 | 2.982477000  |
| 6  | -6.319792000 | -2.484049000 | 1.926611000  |
| 1  | -6.729203000 | -3.480451000 | 2.004851000  |
| 6  | -4.004174000 | -3.874031000 | -1.879369000 |
| 1  | -4.384054000 | -4.875476000 | -1.740751000 |
| 6  | -3.533423000 | -3.227374000 | -3.018179000 |
| 1  | -3.463212000 | -3.621586000 | -4.020609000 |
| 6  | -3.183549000 | -1.951452000 | -2.565431000 |

|    |              |              |              |
|----|--------------|--------------|--------------|
| 1  | -2.789939000 | -1.115852000 | -3.125840000 |
| 8  | 3.259086000  | 0.674372000  | -1.120668000 |
| 8  | 3.260610000  | -0.679344000 | 1.121186000  |
| 6  | 2.119856000  | 0.364687000  | -0.617719000 |
| 6  | 2.120654000  | -0.372651000 | 0.617765000  |
| 6  | 0.813337000  | 1.434300000  | -2.461181000 |
| 6  | -0.421892000 | 1.742478000  | -2.999695000 |
| 6  | 0.868397000  | 0.727943000  | -1.246100000 |
| 6  | -1.580642000 | 1.344992000  | -2.317201000 |
| 6  | -0.350701000 | 0.363217000  | -0.629916000 |
| 7  | -1.546942000 | 0.673050000  | -1.166570000 |
| 6  | 0.870139000  | -0.739696000 | 1.245240000  |
| 6  | -0.349508000 | -0.377096000 | 0.629154000  |
| 1  | 1.740071000  | 1.719635000  | -2.947994000 |
| 1  | -0.510363000 | 2.289192000  | -3.932339000 |
| 1  | -2.568233000 | 1.578202000  | -2.700730000 |
| 6  | 0.816226000  | -1.448814000 | 2.459272000  |
| 7  | -1.544651000 | -0.692113000 | 1.165341000  |
| 6  | -1.577805000 | -1.367265000 | 2.313521000  |
| 6  | -0.417875000 | -1.762639000 | 2.996157000  |
| 1  | 1.743669000  | -1.732191000 | 2.945908000  |
| 1  | -2.565021000 | -1.605894000 | 2.694678000  |
| 1  | -0.505121000 | -2.311964000 | 3.927369000  |
| 27 | 4.686362000  | -0.001189000 | 0.000046000  |
| 8  | 4.600408000  | -1.613917000 | -0.998842000 |
| 8  | 6.016399000  | -0.592364000 | 1.197369000  |
| 8  | 6.014899000  | 0.592132000  | -1.197866000 |
| 8  | 4.598168000  | 1.611349000  | 0.998882000  |
| 6  | 5.343514000  | -2.628416000 | -0.799584000 |
| 6  | 6.315090000  | -2.739394000 | 0.207250000  |
| 6  | 6.586082000  | -1.733866000 | 1.143350000  |
| 6  | 6.582177000  | 1.734878000  | -1.144623000 |
| 6  | 6.309522000  | 2.740197000  | -0.208805000 |
| 6  | 5.338937000  | 2.627404000  | 0.798797000  |
| 1  | 6.878629000  | -3.661250000 | 0.272376000  |
| 1  | 6.871031000  | 3.663243000  | -0.274608000 |
| 6  | 5.102376000  | 3.773751000  | 1.752516000  |
| 1  | 4.054938000  | 4.086525000  | 1.690428000  |
| 1  | 5.278416000  | 3.430737000  | 2.777352000  |
| 1  | 5.748546000  | 4.627230000  | 1.539521000  |
| 6  | 7.623523000  | 1.958872000  | -2.215197000 |
| 1  | 8.083715000  | 2.945766000  | -2.140890000 |
| 1  | 8.398137000  | 1.189186000  | -2.134427000 |
| 1  | 7.157665000  | 1.848359000  | -3.199861000 |
| 6  | 7.628475000  | -1.956093000 | 2.213273000  |
| 1  | 7.163002000  | -1.846648000 | 3.198230000  |



|   |             |              |              |
|---|-------------|--------------|--------------|
| 1 | 8.090530000 | -2.942079000 | 2.138471000  |
| 1 | 8.401578000 | -1.184916000 | 2.132181000  |
| 6 | 5.108486000 | -3.775182000 | -1.753198000 |
| 1 | 5.758249000 | -4.626461000 | -1.542329000 |
| 1 | 4.062356000 | -4.091798000 | -1.688290000 |
| 1 | 5.280391000 | -3.431110000 | -2.778368000 |

$\text{HS-Co}^{\text{II}}\text{-BQ-Ls-Fe}^{\text{II}}$ , **5** ( $\text{R}_1 = \text{CH}_3$ ,  $\text{R}_2 = \text{CH}_3$ )

$E = -5011.45911$  a.u.,  $E^{\text{ZPE}} = -5010.78429$  a.u.

|    |              |              |              |
|----|--------------|--------------|--------------|
| 26 | -3.321386000 | -0.000005000 | 0.000004000  |
| 7  | -3.326875000 | 1.800958000  | 0.959990000  |
| 7  | -3.847475000 | 2.951374000  | 0.452742000  |
| 7  | -5.121768000 | 1.927999000  | -1.476810000 |
| 7  | -4.780208000 | 0.626459000  | -1.253954000 |
| 7  | -4.780244000 | -0.626422000 | 1.253967000  |
| 7  | -5.121853000 | -1.927948000 | 1.476819000  |
| 7  | -3.847574000 | -2.951370000 | -0.452727000 |
| 7  | -3.326923000 | -1.800974000 | -0.959968000 |
| 5  | -4.247255000 | 3.136494000  | -1.039670000 |
| 1  | -3.246024000 | 3.210939000  | -1.717552000 |
| 1  | -4.913196000 | 4.136716000  | -1.130556000 |
| 5  | -4.247396000 | -3.136482000 | 1.039679000  |
| 1  | -3.246178000 | -3.211002000 | 1.717571000  |
| 1  | -4.913391000 | -4.136669000 | 1.130537000  |
| 6  | -2.971439000 | 2.070808000  | 2.229871000  |
| 1  | -2.556537000 | 1.303333000  | 2.863044000  |
| 6  | -3.255193000 | 3.401310000  | 2.550224000  |
| 1  | -3.087659000 | 3.906216000  | 3.489076000  |
| 6  | -3.813534000 | 3.920601000  | 1.389836000  |
| 1  | -4.182618000 | 4.908790000  | 1.159748000  |
| 6  | -6.264421000 | 1.978834000  | -2.193463000 |
| 1  | -6.688595000 | 2.932937000  | -2.468522000 |
| 6  | -6.690237000 | 0.682215000  | -2.448986000 |
| 1  | -7.570151000 | 0.369545000  | -2.989827000 |
| 6  | -5.732098000 | -0.127880000 | -1.831839000 |
| 1  | -5.691365000 | -1.203618000 | -1.762654000 |
| 6  | -5.732162000 | 0.127951000  | 1.831761000  |
| 1  | -5.691390000 | 1.203687000  | 1.762567000  |
| 6  | -6.690366000 | -0.682108000 | 2.448853000  |
| 1  | -7.570309000 | -0.369404000 | 2.989627000  |
| 6  | -6.264570000 | -1.978742000 | 2.193376000  |
| 1  | -6.688786000 | -2.932830000 | 2.468422000  |
| 6  | -3.813626000 | -3.920607000 | -1.389811000 |
| 1  | -4.182739000 | -4.908784000 | -1.159726000 |
| 6  | -3.255227000 | -3.401345000 | -2.550184000 |

|    |              |              |              |
|----|--------------|--------------|--------------|
| 1  | -3.087677000 | -3.906267000 | -3.489024000 |
| 6  | -2.971469000 | -2.070842000 | -2.229841000 |
| 1  | -2.556535000 | -1.303379000 | -2.863009000 |
| 8  | 2.997326000  | -0.540237000 | 1.193151000  |
| 8  | 2.997324000  | 0.540303000  | -1.193092000 |
| 6  | 1.888029000  | -0.315305000 | 0.678062000  |
| 6  | 1.888028000  | 0.315331000  | -0.678020000 |
| 6  | 0.540280000  | -1.222239000 | 2.588627000  |
| 6  | -0.714022000 | -1.468518000 | 3.125518000  |
| 6  | 0.617073000  | -0.628813000 | 1.321711000  |
| 6  | -1.856371000 | -1.132342000 | 2.394178000  |
| 6  | -0.581025000 | -0.317544000 | 0.651590000  |
| 7  | -1.804630000 | -0.572820000 | 1.173411000  |
| 6  | 0.617070000  | 0.628806000  | -1.321681000 |
| 6  | -0.581027000 | 0.317514000  | -0.651567000 |
| 1  | 1.454720000  | -1.467362000 | 3.118658000  |
| 1  | -0.828303000 | -1.922995000 | 4.103476000  |
| 1  | -2.847464000 | -1.305562000 | 2.791372000  |
| 6  | 0.540273000  | 1.222237000  | -2.588593000 |
| 7  | -1.804631000 | 0.572777000  | -1.173390000 |
| 6  | -1.856377000 | 1.132314000  | -2.394152000 |
| 6  | -0.714032000 | 1.468507000  | -3.125487000 |
| 1  | 1.454709000  | 1.467382000  | -3.118619000 |
| 1  | -2.847475000 | 1.305537000  | -2.791338000 |
| 1  | -0.828312000 | 1.922997000  | -4.103439000 |
| 27 | 4.676854000  | 0.000007000  | 0.000024000  |
| 8  | 4.648119000  | 1.760653000  | 0.971650000  |
| 8  | 6.012442000  | 0.802410000  | -1.258772000 |
| 8  | 6.012407000  | -0.802485000 | 1.258785000  |
| 8  | 4.648030000  | -1.760620000 | -0.971632000 |
| 6  | 5.476854000  | 2.721940000  | 0.876863000  |
| 6  | 6.490145000  | 2.815623000  | -0.093684000 |
| 6  | 6.689066000  | 1.869961000  | -1.115879000 |
| 6  | 6.689009000  | -1.870042000 | 1.115853000  |
| 6  | 6.490053000  | -2.815667000 | 0.093629000  |
| 6  | 5.476753000  | -2.721927000 | -0.876901000 |
| 1  | 7.129773000  | 3.689769000  | -0.078582000 |
| 1  | 7.129679000  | -3.689815000 | 0.078473000  |
| 6  | 5.309561000  | 3.830904000  | 1.891892000  |
| 1  | 4.295834000  | 4.239183000  | 1.817952000  |
| 1  | 5.416661000  | 3.413053000  | 2.898735000  |
| 1  | 6.033807000  | 4.637185000  | 1.756648000  |
| 6  | 7.764514000  | 2.104881000  | -2.153798000 |
| 1  | 8.465120000  | 1.263039000  | -2.143257000 |
| 1  | 7.305623000  | 2.129406000  | -3.148007000 |
| 1  | 8.313223000  | 3.034247000  | -1.986211000 |

|   |             |              |              |
|---|-------------|--------------|--------------|
| 6 | 7.764423000 | -2.105047000 | 2.153788000  |
| 1 | 7.305402000 | -2.130256000 | 3.147926000  |
| 1 | 8.313491000 | -3.034135000 | 1.985834000  |
| 1 | 8.464693000 | -1.262927000 | 2.143768000  |
| 6 | 5.309447000 | -3.830828000 | -1.891996000 |
| 1 | 6.033578000 | -4.637201000 | -1.756695000 |
| 1 | 4.295659000 | -4.238979000 | -1.818205000 |
| 1 | 5.416734000 | -3.412945000 | -2.898806000 |

$\text{HS-Co}^{\text{II}}\text{-BQ-HS-Fe}^{\text{II}}$ , **5** ( $\text{R}_1 = \text{CH}_3$ ,  $\text{R}_2 = \text{CH}_3$ )

$E = -5011.45242$  a.u.,  $E^{\text{ZPE}} = -5010.78190$  a.u.

|    |              |              |              |
|----|--------------|--------------|--------------|
| 26 | -3.472692000 | -0.000066000 | -0.000050000 |
| 7  | -3.485868000 | 1.973830000  | 1.044500000  |
| 7  | -4.022508000 | 3.106249000  | 0.515872000  |
| 7  | -5.235477000 | 2.115594000  | -1.499824000 |
| 7  | -4.881776000 | 0.799921000  | -1.419347000 |
| 7  | -4.881956000 | -0.799640000 | 1.419246000  |
| 7  | -5.235929000 | -2.115227000 | 1.499849000  |
| 7  | -4.023093000 | -3.106345000 | -0.515689000 |
| 7  | -3.486381000 | -1.974029000 | -1.044458000 |
| 5  | -4.312079000 | 3.272652000  | -1.008571000 |
| 1  | -3.265141000 | 3.241141000  | -1.616229000 |
| 1  | -4.900568000 | 4.311877000  | -1.167703000 |
| 5  | -4.312749000 | -3.272534000 | 1.008756000  |
| 1  | -3.265841000 | -3.241173000 | 1.616465000  |
| 1  | -4.901467000 | -4.311615000 | 1.167982000  |
| 6  | -3.210647000 | 2.245194000  | 2.331592000  |
| 1  | -2.789100000 | 1.485026000  | 2.973438000  |
| 6  | -3.564070000 | 3.562359000  | 2.646469000  |
| 1  | -3.466376000 | 4.068873000  | 3.594534000  |
| 6  | -4.075392000 | 4.070413000  | 1.457924000  |
| 1  | -4.462646000 | 5.048692000  | 1.214682000  |
| 6  | -6.411011000 | 2.225201000  | -2.146931000 |
| 1  | -6.849302000 | 3.197857000  | -2.315041000 |
| 6  | -6.851769000 | 0.953554000  | -2.502095000 |
| 1  | -7.757727000 | 0.691314000  | -3.026635000 |
| 6  | -5.861526000 | 0.096079000  | -2.018393000 |
| 1  | -5.802877000 | -0.981656000 | -2.060530000 |
| 6  | -5.861580000 | -0.095517000 | 2.018170000  |
| 1  | -5.802702000 | 0.982211000  | 2.060192000  |
| 6  | -6.852025000 | -0.952732000 | 2.501914000  |
| 1  | -7.757951000 | -0.690244000 | 3.026385000  |
| 6  | -6.411515000 | -2.224512000 | 2.146911000  |
| 1  | -6.850017000 | -3.197058000 | 2.315108000  |
| 6  | -4.076122000 | -4.070610000 | -1.457638000 |

|    |              |              |              |
|----|--------------|--------------|--------------|
| 1  | -4.463503000 | -5.048810000 | -1.214285000 |
| 6  | -3.564784000 | -3.562738000 | -2.646247000 |
| 1  | -3.467183000 | -4.069360000 | -3.594264000 |
| 6  | -3.211156000 | -2.245591000 | -2.331503000 |
| 1  | -2.789525000 | -1.485548000 | -2.973441000 |
| 8  | 3.117801000  | 0.524071000  | -1.202027000 |
| 8  | 3.117771000  | -0.524279000 | 1.202081000  |
| 6  | 2.009676000  | 0.303267000  | -0.680333000 |
| 6  | 2.009658000  | -0.303517000 | 0.680344000  |
| 6  | 0.680305000  | 1.178240000  | -2.603440000 |
| 6  | -0.559218000 | 1.434789000  | -3.166776000 |
| 6  | 0.737033000  | 0.601863000  | -1.327080000 |
| 6  | -1.710220000 | 1.112890000  | -2.441798000 |
| 6  | -0.474307000 | 0.304069000  | -0.665388000 |
| 7  | -1.674450000 | 0.560071000  | -1.223513000 |
| 6  | 0.736992000  | -0.602141000 | 1.327040000  |
| 6  | -0.474333000 | -0.304403000 | 0.665290000  |
| 1  | 1.607186000  | 1.408254000  | -3.119046000 |
| 1  | -0.651541000 | 1.883276000  | -4.149817000 |
| 1  | -2.699952000 | 1.305768000  | -2.841399000 |
| 6  | 0.680228000  | -1.178484000 | 2.603411000  |
| 7  | -1.674506000 | -0.560417000 | 1.223356000  |
| 6  | -1.710297000 | -1.113195000 | 2.441665000  |
| 6  | -0.559319000 | -1.435040000 | 3.166699000  |
| 1  | 1.607091000  | -1.408451000 | 3.119071000  |
| 1  | -2.700035000 | -1.306102000 | 2.841236000  |
| 1  | -0.651674000 | -1.883493000 | 4.149753000  |
| 27 | 4.799082000  | -0.000043000 | 0.000050000  |
| 8  | 4.768796000  | -1.771415000 | -0.950412000 |
| 8  | 6.135015000  | -0.788149000 | 1.267616000  |
| 8  | 6.134933000  | 0.788191000  | -1.267519000 |
| 8  | 4.768614000  | 1.771344000  | 0.950497000  |
| 6  | 5.594143000  | -2.734254000 | -0.842430000 |
| 6  | 6.606200000  | -2.818653000 | 0.130214000  |
| 6  | 6.807999000  | -1.859859000 | 1.139581000  |
| 6  | 6.807755000  | 1.860012000  | -1.139555000 |
| 6  | 6.605717000  | 2.818907000  | -0.130333000 |
| 6  | 5.593662000  | 2.734412000  | 0.842308000  |
| 1  | 7.243254000  | -3.694811000 | 0.126916000  |
| 1  | 7.242526000  | 3.695244000  | -0.127189000 |
| 6  | 7.882428000  | -2.084401000 | 2.180836000  |
| 1  | 7.423160000  | -2.094827000 | 3.175126000  |
| 1  | 8.428280000  | -3.017556000 | 2.025413000  |
| 1  | 8.585613000  | -1.244928000 | 2.159732000  |
| 6  | 5.424198000  | -3.855439000 | -1.843451000 |
| 1  | 6.144602000  | -4.663081000 | -1.696322000 |

|   |             |              |              |
|---|-------------|--------------|--------------|
| 1 | 4.408547000 | -4.258333000 | -1.766613000 |
| 1 | 5.535370000 | -3.451091000 | -2.855360000 |
| 6 | 5.423360000 | 3.855771000  | 1.843077000  |
| 1 | 4.407561000 | 4.258279000  | 1.766177000  |
| 1 | 5.534714000 | 3.451713000  | 2.855083000  |
| 1 | 6.143474000 | 4.663631000  | 1.695729000  |
| 6 | 7.882453000 | 2.084420000  | -2.180558000 |
| 1 | 8.587507000 | 1.246556000  | -2.156781000 |
| 1 | 7.423981000 | 2.091328000  | -3.175219000 |
| 1 | 8.426241000 | 3.019071000  | -2.026905000 |

$\text{LSCo}^{\text{III}}\text{-SQ-LSFe}^{\text{II}}$ , **5** ( $\text{R}_1 = \text{CH}_3$ ,  $\text{R}_2 = \text{CF}_3$ )

$E = -5606.85491$  a.u.,  $E^{\text{ZPE}} = -5606.22205$  a.u.

|    |             |              |              |
|----|-------------|--------------|--------------|
| 26 | 3.869402000 | -0.059033000 | -0.053607000 |
| 7  | 3.905628000 | -1.839971000 | 0.942403000  |
| 7  | 4.375563000 | -3.009544000 | 0.429767000  |
| 7  | 5.546771000 | -2.046546000 | -1.594600000 |
| 7  | 5.239795000 | -0.735368000 | -1.378449000 |
| 7  | 5.411422000 | 0.569455000  | 1.099173000  |
| 7  | 5.796051000 | 1.867883000  | 1.260220000  |
| 7  | 4.422174000 | 2.869173000  | -0.613591000 |
| 7  | 3.840549000 | 1.719754000  | -1.052210000 |
| 5  | 4.683684000 | -3.232577000 | -1.079743000 |
| 1  | 3.643193000 | -3.307670000 | -1.694946000 |
| 1  | 5.330893000 | -4.243962000 | -1.186062000 |
| 5  | 4.923914000 | 3.085423000  | 0.843158000  |
| 1  | 3.972057000 | 3.205477000  | 1.582281000  |
| 1  | 5.619212000 | 4.069868000  | 0.860361000  |
| 6  | 3.625928000 | -2.075860000 | 2.237633000  |
| 1  | 3.264805000 | -1.286056000 | 2.876434000  |
| 6  | 3.908267000 | -3.404091000 | 2.569622000  |
| 1  | 3.793948000 | -3.885470000 | 3.528678000  |
| 6  | 4.384908000 | -3.957752000 | 1.388628000  |
| 1  | 4.725068000 | -4.956295000 | 1.158541000  |
| 6  | 6.638822000 | -2.130531000 | -2.383637000 |
| 1  | 7.030076000 | -3.096756000 | -2.665166000 |
| 6  | 7.065913000 | -0.846490000 | -2.694530000 |
| 1  | 7.913064000 | -0.559230000 | -3.298175000 |
| 6  | 6.162305000 | -0.008517000 | -2.033516000 |
| 1  | 6.141173000 | 1.068953000  | -1.984743000 |
| 6  | 6.378729000 | -0.190473000 | 1.643414000  |
| 1  | 6.310004000 | -1.266446000 | 1.611027000  |
| 6  | 7.390457000 | 0.613611000  | 2.177377000  |
| 1  | 8.293857000 | 0.295397000  | 2.674539000  |
| 6  | 6.979936000 | 1.912104000  | 1.906768000  |

|    |              |              |              |
|----|--------------|--------------|--------------|
| 1  | 7.441308000  | 2.863366000  | 2.126132000  |
| 6  | 4.337561000  | 3.817686000  | -1.568737000 |
| 1  | 4.742251000  | 4.802571000  | -1.390127000 |
| 6  | 3.682094000  | 3.285229000  | -2.670696000 |
| 1  | 3.453061000  | 3.772705000  | -3.605758000 |
| 6  | 3.395228000  | 1.969154000  | -2.297533000 |
| 1  | 2.915289000  | 1.198427000  | -2.878390000 |
| 8  | -2.377574000 | 0.454707000  | 1.559141000  |
| 8  | -2.524847000 | -0.760027000 | -0.745198000 |
| 6  | -1.266590000 | 0.211696000  | 0.953203000  |
| 6  | -1.348754000 | -0.451919000 | -0.320815000 |
| 6  | 0.170725000  | 1.218237000  | 2.747096000  |
| 6  | 1.452345000  | 1.504183000  | 3.185255000  |
| 6  | 0.016488000  | 0.575021000  | 1.507703000  |
| 6  | 2.553227000  | 1.157584000  | 2.392086000  |
| 6  | 1.178142000  | 0.262745000  | 0.769038000  |
| 7  | 2.430387000  | 0.554608000  | 1.201174000  |
| 6  | -0.150648000 | -0.749980000 | -1.070111000 |
| 6  | 1.095459000  | -0.401326000 | -0.506762000 |
| 1  | -0.706730000 | 1.471158000  | 3.332360000  |
| 1  | 1.623703000  | 1.998541000  | 4.135252000  |
| 1  | 3.564156000  | 1.363240000  | 2.716961000  |
| 6  | -0.160489000 | -1.363205000 | -2.333986000 |
| 7  | 2.279544000  | -0.648142000 | -1.120149000 |
| 6  | 2.245020000  | -1.224902000 | -2.329998000 |
| 6  | 1.051004000  | -1.590082000 | -2.963954000 |
| 1  | -1.105839000 | -1.635409000 | -2.790948000 |
| 1  | 3.203619000  | -1.392940000 | -2.802599000 |
| 1  | 1.095847000  | -2.055005000 | -3.942720000 |
| 27 | -3.852936000 | -0.174367000 | 0.508304000  |
| 8  | -3.687335000 | -1.845571000 | 1.399480000  |
| 8  | -5.271718000 | -0.717194000 | -0.621828000 |
| 8  | -5.114477000 | 0.328068000  | 1.829173000  |
| 8  | -3.862233000 | 1.498072000  | -0.392628000 |
| 6  | -4.408430000 | -2.867730000 | 1.190852000  |
| 6  | -5.453166000 | -2.942552000 | 0.242197000  |
| 6  | -5.789923000 | -1.874494000 | -0.574535000 |
| 6  | -5.713004000 | 1.447786000  | 1.890870000  |
| 6  | -5.514937000 | 2.523797000  | 1.000714000  |
| 6  | -4.611600000 | 2.460482000  | -0.050589000 |
| 1  | -6.005700000 | -3.865978000 | 0.146740000  |
| 1  | -6.080969000 | 3.432286000  | 1.147065000  |
| 6  | -6.941404000 | -2.032767000 | -1.587517000 |
| 9  | -7.509685000 | -3.257518000 | -1.537517000 |
| 9  | -7.910085000 | -1.126927000 | -1.342258000 |
| 9  | -6.501098000 | -1.839054000 | -2.844097000 |

|   |              |              |              |
|---|--------------|--------------|--------------|
| 6 | -4.421928000 | 3.693714000  | -0.957465000 |
| 9 | -4.628500000 | 3.375294000  | -2.246958000 |
| 9 | -5.266618000 | 4.700065000  | -0.643053000 |
| 9 | -3.164384000 | 4.168636000  | -0.842372000 |
| 6 | -4.085353000 | -4.064758000 | 2.047986000  |
| 1 | -4.699963000 | -4.930017000 | 1.795018000  |
| 1 | -3.027302000 | -4.319059000 | 1.930211000  |
| 1 | -4.241066000 | -3.803264000 | 3.100055000  |
| 6 | -6.706107000 | 1.577755000  | 3.017022000  |
| 1 | -7.552541000 | 0.908935000  | 2.823795000  |
| 1 | -6.240778000 | 1.254276000  | 3.952533000  |
| 1 | -7.076589000 | 2.598776000  | 3.120679000  |

$LSCo^{III}-SQ-HSFe^{II}$ , **5** ( $R_1=CH_3$ ,  $R_2=CF_3$ )

$E=-5606.84901$  a.u.,  $E^{ZPE}=-5606.22032$  a.u.

|    |             |              |              |
|----|-------------|--------------|--------------|
| 26 | 4.022181000 | -0.035440000 | -0.067923000 |
| 7  | 4.026519000 | -1.982901000 | 1.032823000  |
| 7  | 4.509193000 | -3.143011000 | 0.511742000  |
| 7  | 5.638800000 | -2.241925000 | -1.595719000 |
| 7  | 5.324117000 | -0.915894000 | -1.534191000 |
| 7  | 5.567101000 | 0.702063000  | 1.241920000  |
| 7  | 6.007192000 | 1.994007000  | 1.260237000  |
| 7  | 4.675749000 | 3.012181000  | -0.665769000 |
| 7  | 4.027632000 | 1.901327000  | -1.111728000 |
| 5  | 4.720059000 | -3.364256000 | -1.018430000 |
| 1  | 3.646608000 | -3.334765000 | -1.576318000 |
| 1  | 5.284693000 | -4.417931000 | -1.169746000 |
| 5  | 5.119033000 | 3.196738000  | 0.820291000  |
| 1  | 4.134636000 | 3.252648000  | 1.523485000  |
| 1  | 5.785392000 | 4.198255000  | 0.889345000  |
| 6  | 3.812347000 | -2.209263000 | 2.339947000  |
| 1  | 3.442574000 | -1.419777000 | 2.978089000  |
| 6  | 4.151942000 | -3.524761000 | 2.676193000  |
| 1  | 4.092722000 | -4.000624000 | 3.643163000  |
| 6  | 4.590617000 | -4.079501000 | 1.479403000  |
| 1  | 4.945625000 | -5.072542000 | 1.247057000  |
| 6  | 6.762450000 | -2.401244000 | -2.319691000 |
| 1  | 7.164300000 | -3.389659000 | -2.486613000 |
| 6  | 7.207317000 | -1.152983000 | -2.746241000 |
| 1  | 8.079629000 | -0.930866000 | -3.341498000 |
| 6  | 6.275392000 | -0.255392000 | -2.222367000 |
| 1  | 6.240281000 | 0.821898000  | -2.294368000 |
| 6  | 6.542125000 | -0.047096000 | 1.792195000  |
| 1  | 6.421787000 | -1.117559000 | 1.869388000  |
| 6  | 7.615047000 | 0.756916000  | 2.181770000  |

|    |              |              |              |
|----|--------------|--------------|--------------|
| 1  | 8.538261000  | 0.450311000  | 2.649067000  |
| 6  | 7.229289000  | 2.045184000  | 1.822300000  |
| 1  | 7.737006000  | 2.992022000  | 1.932674000  |
| 6  | 4.675236000  | 3.956158000  | -1.627694000 |
| 1  | 5.132830000  | 4.917477000  | -1.446750000 |
| 6  | 4.014228000  | 3.457671000  | -2.745501000 |
| 1  | 3.840029000  | 3.955085000  | -3.687319000 |
| 6  | 3.628670000  | 2.167778000  | -2.368284000 |
| 1  | 3.098901000  | 1.421957000  | -2.942775000 |
| 8  | -2.636611000 | -0.756923000 | -0.742390000 |
| 8  | -2.495330000 | 0.444293000  | 1.572671000  |
| 6  | -1.460303000 | -0.443760000 | -0.311685000 |
| 6  | -1.381540000 | 0.207030000  | 0.961281000  |
| 6  | -0.287301000 | -1.329674000 | -2.328695000 |
| 6  | 0.908131000  | -1.561283000 | -2.984825000 |
| 6  | -0.260618000 | -0.723959000 | -1.060691000 |
| 6  | 2.109132000  | -1.193224000 | -2.364189000 |
| 6  | 0.998517000  | -0.374079000 | -0.511249000 |
| 7  | 2.158180000  | -0.614153000 | -1.162266000 |
| 6  | -0.099912000 | 0.568079000  | 1.513345000  |
| 6  | 1.078807000  | 0.271336000  | 0.783244000  |
| 1  | -1.242876000 | -1.597803000 | -2.767295000 |
| 1  | 0.932615000  | -2.026754000 | -3.964078000 |
| 1  | 3.065886000  | -1.371246000 | -2.843290000 |
| 6  | 0.034311000  | 1.209546000  | 2.757833000  |
| 7  | 2.308488000  | 0.578235000  | 1.253688000  |
| 6  | 2.413124000  | 1.187179000  | 2.435695000  |
| 6  | 1.299548000  | 1.521794000  | 3.219464000  |
| 1  | -0.857804000 | 1.446450000  | 3.328224000  |
| 1  | 3.421162000  | 1.420719000  | 2.761447000  |
| 1  | 1.445798000  | 2.022579000  | 4.170270000  |
| 27 | -3.963263000 | -0.177101000 | 0.510540000  |
| 8  | -3.967186000 | 1.502254000  | -0.379777000 |
| 8  | -5.232955000 | 0.319418000  | 1.829421000  |
| 8  | -5.379379000 | -0.710857000 | -0.631448000 |
| 8  | -3.806459000 | -1.855306000 | 1.391853000  |
| 6  | -4.713039000 | 2.464717000  | -0.031283000 |
| 6  | -5.619681000 | 2.523570000  | 1.017553000  |
| 6  | -5.827045000 | 1.440424000  | 1.897449000  |
| 6  | -5.892165000 | -1.870589000 | -0.601766000 |
| 6  | -5.556803000 | -2.946677000 | 0.205366000  |
| 6  | -4.521618000 | -2.877317000 | 1.164998000  |
| 1  | -6.182246000 | 3.433350000  | 1.169194000  |
| 1  | -6.104185000 | -3.871506000 | 0.094906000  |
| 6  | -4.515112000 | 3.704956000  | -0.926626000 |
| 9  | -5.356595000 | 4.712778000  | -0.607206000 |



|   |              |              |              |
|---|--------------|--------------|--------------|
| 9 | -3.255854000 | 4.174319000  | -0.802983000 |
| 9 | -4.717695000 | 3.399435000  | -2.220053000 |
| 6 | -7.034513000 | -2.023270000 | -1.625836000 |
| 9 | -8.007022000 | -1.120606000 | -1.383825000 |
| 9 | -6.583420000 | -1.820390000 | -2.877558000 |
| 9 | -7.602081000 | -3.249207000 | -1.590248000 |
| 6 | -4.203286000 | -4.082337000 | 2.013248000  |
| 1 | -3.143681000 | -4.333113000 | 1.901955000  |
| 1 | -4.368588000 | -3.831721000 | 3.066477000  |
| 1 | -4.813626000 | -4.946539000 | 1.746500000  |
| 6 | -6.826529000 | 1.565608000  | 3.018857000  |
| 1 | -6.366761000 | 1.236307000  | 3.955128000  |
| 1 | -7.196388000 | 2.586499000  | 3.126408000  |
| 1 | -7.672647000 | 0.898876000  | 2.817326000  |

${}^{\text{HS}}\text{Co}^{\text{II}}\text{-BQ-}{}_{\text{LS}}\text{Fe}^{\text{II}}$ , **5** ( $\text{R}_1 = \text{CH}_3$ ,  $\text{R}_2 = \text{CF}_3$ )

$E = -5606.84393$  a.u.,  $E^{\text{ZPE}} = -5606.21505$  a.u.

|    |              |              |              |
|----|--------------|--------------|--------------|
| 26 | -4.004260000 | -0.088718000 | 0.051248000  |
| 7  | -4.102286000 | -1.948817000 | -0.775417000 |
| 7  | -4.573176000 | -3.056378000 | -0.139791000 |
| 7  | -5.676743000 | -1.885738000 | 1.807874000  |
| 7  | -5.362801000 | -0.606066000 | 1.453552000  |
| 7  | -5.540040000 | 0.473892000  | -1.134111000 |
| 7  | -5.863261000 | 1.763309000  | -1.441295000 |
| 7  | -4.449858000 | 2.893471000  | 0.320619000  |
| 7  | -3.921988000 | 1.770432000  | 0.880473000  |
| 5  | -4.836366000 | -3.124726000 | 1.391838000  |
| 1  | -3.775596000 | -3.143141000 | 1.978485000  |
| 1  | -5.480231000 | -4.115870000 | 1.622602000  |
| 5  | -4.934293000 | 2.975881000  | -1.154411000 |
| 1  | -3.972666000 | 2.966836000  | -1.893038000 |
| 1  | -5.576775000 | 3.985482000  | -1.288306000 |
| 6  | -3.867252000 | -2.312294000 | -2.050422000 |
| 1  | -3.513143000 | -1.596765000 | -2.774909000 |
| 6  | -4.179654000 | -3.660083000 | -2.245191000 |
| 1  | -4.100843000 | -4.232843000 | -3.156281000 |
| 6  | -4.626941000 | -4.090610000 | -1.002986000 |
| 1  | -4.973199000 | -5.057133000 | -0.668871000 |
| 6  | -6.756888000 | -1.877449000 | 2.617248000  |
| 1  | -7.151620000 | -2.805692000 | 3.002597000  |
| 6  | -7.169037000 | -0.564229000 | 2.799917000  |
| 1  | -8.003846000 | -0.208481000 | 3.383814000  |
| 6  | -6.269780000 | 0.193090000  | 2.043435000  |
| 1  | -6.240465000 | 1.259870000  | 1.886063000  |
| 6  | -6.549740000 | -0.295353000 | -1.579539000 |

|    |              |              |              |
|----|--------------|--------------|--------------|
| 1  | -6.531864000 | -1.362786000 | -1.424612000 |
| 6  | -7.527776000 | 0.491131000  | -2.195314000 |
| 1  | -8.451557000 | 0.162868000  | -2.646155000 |
| 6  | -7.051741000 | 1.790417000  | -2.080129000 |
| 1  | -7.470598000 | 2.731500000  | -2.403845000 |
| 6  | -4.345333000 | 3.925451000  | 1.182024000  |
| 1  | -4.707795000 | 4.903185000  | 0.902150000  |
| 6  | -3.731499000 | 3.477891000  | 2.344275000  |
| 1  | -3.498994000 | 4.045438000  | 3.232002000  |
| 6  | -3.489965000 | 2.122723000  | 2.106159000  |
| 1  | -3.052649000 | 1.395218000  | 2.770694000  |
| 8  | 2.199687000  | 0.225327000  | -1.672512000 |
| 8  | 2.369959000  | -0.703123000 | 0.782570000  |
| 6  | 1.139752000  | 0.073784000  | -1.061154000 |
| 6  | 1.237513000  | -0.471487000 | 0.353658000  |
| 6  | -0.346875000 | 0.874411000  | -2.912676000 |
| 6  | -1.637955000 | 1.103750000  | -3.365333000 |
| 6  | -0.177329000 | 0.371743000  | -1.617350000 |
| 6  | -2.719334000 | 0.841235000  | -2.522164000 |
| 6  | -1.318969000 | 0.132083000  | -0.829988000 |
| 7  | -2.576748000 | 0.371624000  | -1.268619000 |
| 6  | 0.013158000  | -0.698648000 | 1.115195000  |
| 6  | -1.225529000 | -0.407934000 | 0.514264000  |
| 1  | 0.524452000  | 1.064528000  | -3.530716000 |
| 1  | -1.825683000 | 1.487872000  | -4.361726000 |
| 1  | -3.737291000 | 0.996368000  | -2.853075000 |
| 6  | 0.027386000  | -1.190175000 | 2.425688000  |
| 7  | -2.408434000 | -0.597336000 | 1.143395000  |
| 6  | -2.373901000 | -1.062178000 | 2.406372000  |
| 6  | -1.186151000 | -1.364992000 | 3.074826000  |
| 1  | 0.975901000  | -1.413408000 | 2.903162000  |
| 1  | -3.334224000 | -1.179719000 | 2.889904000  |
| 1  | -1.231634000 | -1.737424000 | 4.092073000  |
| 27 | 4.002862000  | -0.201380000 | -0.528831000 |
| 8  | 3.889585000  | 1.642893000  | 0.309828000  |
| 8  | 5.292600000  | 0.568972000  | -1.882396000 |
| 8  | 5.429140000  | -0.871654000 | 0.737154000  |
| 8  | 4.002122000  | -2.030673000 | -1.403522000 |
| 6  | 4.680503000  | 2.603347000  | 0.079564000  |
| 6  | 5.676849000  | 2.691277000  | -0.886216000 |
| 6  | 5.920200000  | 1.666500000  | -1.836117000 |
| 6  | 6.105076000  | -1.927836000 | 0.583643000  |
| 6  | 5.932938000  | -2.939025000 | -0.358469000 |
| 6  | 4.872404000  | -2.944283000 | -1.297700000 |
| 1  | 6.265000000  | 3.596674000  | -0.941300000 |
| 1  | 6.611894000  | -3.780055000 | -0.341340000 |

|   |             |              |              |
|---|-------------|--------------|--------------|
| 6 | 4.431028000 | 3.818274000  | 0.998325000  |
| 9 | 3.183071000 | 4.308247000  | 0.802695000  |
| 9 | 4.528590000 | 3.470057000  | 2.296721000  |
| 9 | 5.296101000 | 4.836887000  | 0.787369000  |
| 6 | 7.245849000 | -2.067753000 | 1.615728000  |
| 9 | 8.105197000 | -1.030438000 | 1.519176000  |
| 9 | 6.754948000 | -2.075362000 | 2.872964000  |
| 9 | 7.969866000 | -3.202232000 | 1.461465000  |
| 6 | 4.728744000 | -4.116657000 | -2.240591000 |
| 1 | 5.472406000 | -4.895581000 | -2.061168000 |
| 1 | 3.724529000 | -4.541276000 | -2.139247000 |
| 1 | 4.824697000 | -3.756890000 | -3.271000000 |
| 6 | 6.986845000 | 1.873076000  | -2.886282000 |
| 1 | 7.417398000 | 2.875882000  | -2.856694000 |
| 1 | 7.783822000 | 1.136994000  | -2.731361000 |
| 1 | 6.560421000 | 1.684182000  | -3.876486000 |

$\text{HS-Co}^{\text{II}}\text{-BQ-HS-Fe}^{\text{II}}$ , **5** ( $\text{R}_1 = \text{CH}_3$ ,  $\text{R}_2 = \text{CF}_3$ )

$E = -5606.83786$  a.u.,  $E^{\text{ZPE}} = -5606.21299$  a.u.

|    |              |              |              |
|----|--------------|--------------|--------------|
| 26 | -4.171928000 | -0.064429000 | 0.065605000  |
| 7  | -4.200540000 | -2.082290000 | -0.866941000 |
| 7  | -4.665558000 | -3.196031000 | -0.237816000 |
| 7  | -5.763091000 | -2.116023000 | 1.798012000  |
| 7  | -5.452029000 | -0.800136000 | 1.611358000  |
| 7  | -5.696186000 | 0.587047000  | -1.292273000 |
| 7  | -6.095538000 | 1.884384000  | -1.439900000 |
| 7  | -4.751279000 | 3.031430000  | 0.398637000  |
| 7  | -4.139061000 | 1.945958000  | 0.947474000  |
| 5  | -4.848986000 | -3.282492000 | 1.309039000  |
| 1  | -3.765181000 | -3.196919000 | 1.841950000  |
| 1  | -5.401494000 | -4.320849000 | 1.565387000  |
| 5  | -5.173897000 | 3.095135000  | -1.102494000 |
| 1  | -4.179672000 | 3.052009000  | -1.792915000 |
| 1  | -5.804371000 | 4.106072000  | -1.273785000 |
| 6  | -4.005487000 | -2.421671000 | -2.153367000 |
| 1  | -3.653859000 | -1.690051000 | -2.866161000 |
| 6  | -4.339166000 | -3.762903000 | -2.366451000 |
| 1  | -4.290452000 | -4.321792000 | -3.288391000 |
| 6  | -4.753830000 | -4.213586000 | -1.118133000 |
| 1  | -5.095693000 | -5.185354000 | -0.794221000 |
| 6  | -6.877247000 | -2.208702000 | 2.546812000  |
| 1  | -7.275117000 | -3.177761000 | 2.809389000  |
| 6  | -7.319948000 | -0.926673000 | 2.862092000  |
| 1  | -8.185394000 | -0.652082000 | 3.445219000  |
| 6  | -6.397280000 | -0.079722000 | 2.247661000  |

|    |              |              |              |
|----|--------------|--------------|--------------|
| 1  | -6.363956000 | 0.999580000  | 2.220461000  |
| 6  | -6.692044000 | -0.183296000 | -1.774377000 |
| 1  | -6.605073000 | -1.259379000 | -1.746551000 |
| 6  | -7.736466000 | 0.611440000  | -2.248089000 |
| 1  | -8.666362000 | 0.289070000  | -2.690684000 |
| 6  | -7.312272000 | 1.916704000  | -2.013528000 |
| 1  | -7.790220000 | 2.862865000  | -2.220402000 |
| 6  | -4.736034000 | 4.053764000  | 1.276147000  |
| 1  | -5.164846000 | 5.007926000  | 1.007993000  |
| 6  | -4.102341000 | 3.635898000  | 2.441950000  |
| 1  | -3.924816000 | 4.208276000  | 3.339406000  |
| 6  | -3.748207000 | 2.309300000  | 2.182990000  |
| 1  | -3.247305000 | 1.603128000  | 2.828912000  |
| 8  | 2.476016000  | -0.699456000 | 0.781307000  |
| 8  | 2.312652000  | 0.248229000  | -1.678380000 |
| 6  | 1.346487000  | -0.451905000 | 0.342376000  |
| 6  | 1.253963000  | 0.095653000  | -1.056966000 |
| 6  | 0.148447000  | -1.162726000 | 2.410684000  |
| 6  | -1.049011000 | -1.346604000 | 3.084066000  |
| 6  | 0.117791000  | -0.667192000 | 1.101094000  |
| 6  | -2.244292000 | -1.035518000 | 2.430859000  |
| 6  | -1.133217000 | -0.369205000 | 0.518370000  |
| 7  | -2.292438000 | -0.555723000 | 1.181247000  |
| 6  | -0.063200000 | 0.404296000  | -1.607544000 |
| 6  | -1.223044000 | 0.167288000  | -0.838102000 |
| 1  | 1.107219000  | -1.387740000 | 2.867190000  |
| 1  | -1.074346000 | -1.729923000 | 4.097986000  |
| 1  | -3.202767000 | -1.173480000 | 2.919103000  |
| 6  | -0.209893000 | 0.929035000  | -2.898566000 |
| 7  | -2.457935000 | 0.423776000  | -1.314891000 |
| 6  | -2.580173000 | 0.924684000  | -2.549524000 |
| 6  | -1.483787000 | 1.193687000  | -3.374432000 |
| 1  | 0.677886000  | 1.115211000  | -3.494724000 |
| 1  | -3.594371000 | 1.118753000  | -2.881099000 |
| 1  | -1.644154000 | 1.605119000  | -4.364701000 |
| 27 | 4.112623000  | -0.195359000 | -0.528761000 |
| 8  | 4.004356000  | 1.649674000  | 0.316148000  |
| 8  | 5.413566000  | 0.574772000  | -1.876796000 |
| 8  | 5.538684000  | -0.873663000 | 0.739345000  |
| 8  | 4.108995000  | -2.024067000 | -1.409518000 |
| 6  | 4.793357000  | 2.610437000  | 0.083737000  |
| 6  | 5.790490000  | 2.699129000  | -0.881555000 |
| 6  | 6.038403000  | 1.673161000  | -1.829309000 |
| 6  | 6.203592000  | -1.936791000 | 0.590023000  |
| 6  | 6.025393000  | -2.948279000 | -0.350992000 |
| 6  | 4.970087000  | -2.944713000 | -1.296368000 |

|   |             |              |              |
|---|-------------|--------------|--------------|
| 1 | 6.377302000 | 3.605413000  | -0.936734000 |
| 1 | 6.696211000 | -3.795735000 | -0.329414000 |
| 6 | 4.541829000 | 3.827070000  | 0.999963000  |
| 9 | 3.293098000 | 4.315663000  | 0.802789000  |
| 9 | 4.638560000 | 3.482431000  | 2.299545000  |
| 9 | 5.405314000 | 4.847351000  | 0.788206000  |
| 6 | 7.339008000 | -2.087308000 | 1.626764000  |
| 9 | 8.210137000 | -1.059414000 | 1.532882000  |
| 9 | 6.843559000 | -2.088122000 | 2.882568000  |
| 9 | 8.052327000 | -3.229689000 | 1.477704000  |
| 6 | 4.822106000 | -4.117915000 | -2.238404000 |
| 1 | 5.559485000 | -4.901906000 | -2.054807000 |
| 1 | 3.814511000 | -4.535278000 | -2.140243000 |
| 1 | 4.924605000 | -3.760454000 | -3.268963000 |
| 6 | 7.109130000 | 1.880869000  | -2.875793000 |
| 1 | 7.906925000 | 1.146544000  | -2.716813000 |
| 1 | 6.686938000 | 1.689901000  | -3.867423000 |
| 1 | 7.537687000 | 2.884585000  | -2.845833000 |

MECP<sub>2-4</sub>, **5** (R<sub>1</sub>= CH<sub>3</sub>, R<sub>2</sub>=CF<sub>3</sub>)

E= -5606.83712 a.u.

|    |             |              |              |
|----|-------------|--------------|--------------|
| 26 | 3.959028000 | -0.086556000 | -0.050370000 |
| 7  | 4.062828000 | -1.952025000 | 0.757745000  |
| 7  | 4.535363000 | -3.054571000 | 0.113651000  |
| 7  | 5.640956000 | -1.870909000 | -1.822744000 |
| 7  | 5.325848000 | -0.594536000 | -1.457772000 |
| 7  | 5.503398000 | 0.466151000  | 1.139924000  |
| 7  | 5.830194000 | 1.752061000  | 1.457664000  |
| 7  | 4.417984000 | 2.896040000  | -0.293849000 |
| 7  | 3.886712000 | 1.778231000  | -0.862149000 |
| 5  | 4.801768000 | -3.114395000 | -1.418179000 |
| 1  | 3.744137000 | -3.131621000 | -2.007576000 |
| 1  | 5.451021000 | -4.102273000 | -1.651271000 |
| 5  | 4.905107000 | 2.969867000  | 1.181258000  |
| 1  | 3.946547000 | 2.960681000  | 1.921500000  |
| 1  | 5.554073000 | 3.975876000  | 1.316809000  |
| 6  | 3.829296000 | -2.324871000 | 2.030616000  |
| 1  | 3.473534000 | -1.614772000 | 2.759072000  |
| 6  | 4.143066000 | -3.673662000 | 2.214759000  |
| 1  | 4.063625000 | -4.254387000 | 3.120772000  |
| 6  | 4.590268000 | -4.094603000 | 0.969111000  |
| 1  | 4.936237000 | -5.058665000 | 0.627421000  |
| 6  | 6.722060000 | -1.856378000 | -2.630251000 |
| 1  | 7.116725000 | -2.781582000 | -3.023516000 |
| 6  | 7.135028000 | -0.541876000 | -2.801264000 |
| 1  | 7.970195000 | -0.182008000 | -3.382411000 |

|    |              |              |              |
|----|--------------|--------------|--------------|
| 6  | 6.234871000  | 0.209182000  | -2.039334000 |
| 1  | 6.207735000  | 1.274497000  | -1.873236000 |
| 6  | 6.513065000  | -0.308365000 | 1.577673000  |
| 1  | 6.495284000  | -1.374262000 | 1.413758000  |
| 6  | 7.493068000  | 0.471169000  | 2.199510000  |
| 1  | 8.416289000  | 0.138107000  | 2.648360000  |
| 6  | 7.019021000  | 1.772087000  | 2.095486000  |
| 1  | 7.439487000  | 2.709834000  | 2.427427000  |
| 6  | 4.317082000  | 3.933829000  | -1.147971000 |
| 1  | 4.681076000  | 4.908845000  | -0.860401000 |
| 6  | 3.703263000  | 3.496181000  | -2.314165000 |
| 1  | 3.472055000  | 4.071839000  | -3.197040000 |
| 6  | 3.457626000  | 2.140126000  | -2.086449000 |
| 1  | 3.017965000  | 1.418157000  | -2.754899000 |
| 8  | -2.283940000 | 0.269905000  | 1.650107000  |
| 8  | -2.443181000 | -0.756926000 | -0.759763000 |
| 6  | -1.197438000 | 0.081630000  | 1.031139000  |
| 6  | -1.288174000 | -0.482306000 | -0.325682000 |
| 6  | 0.279800000  | 0.850933000  | 2.912629000  |
| 6  | 1.570104000  | 1.072237000  | 3.366280000  |
| 6  | 0.106332000  | 0.361376000  | 1.608370000  |
| 6  | 2.657105000  | 0.816755000  | 2.524193000  |
| 6  | 1.258863000  | 0.123962000  | 0.827904000  |
| 7  | 2.518727000  | 0.358794000  | 1.272185000  |
| 6  | -0.079843000 | -0.687253000 | -1.104163000 |
| 6  | 1.166889000  | -0.396650000 | -0.510435000 |
| 1  | -0.586913000 | 1.044273000  | 3.536364000  |
| 1  | 1.756499000  | 1.449034000  | 4.365327000  |
| 1  | 3.673345000  | 0.971044000  | 2.856915000  |
| 6  | -0.091298000 | -1.163516000 | -2.424309000 |
| 7  | 2.351468000  | -0.579994000 | -1.144619000 |
| 6  | 2.314079000  | -1.033503000 | -2.405430000 |
| 6  | 1.121441000  | -1.329668000 | -3.073397000 |
| 1  | -1.036347000 | -1.388209000 | -2.908014000 |
| 1  | 3.272759000  | -1.149885000 | -2.889949000 |
| 1  | 1.165620000  | -1.693900000 | -4.093346000 |
| 27 | -3.922055000 | -0.204896000 | 0.520542000  |
| 8  | -3.838523000 | 1.568224000  | -0.338582000 |
| 8  | -5.246110000 | 0.460126000  | 1.832544000  |
| 8  | -5.375015000 | -0.775326000 | -0.701851000 |
| 8  | -3.933517000 | -1.970925000 | 1.412312000  |
| 6  | -4.614610000 | 2.536361000  | -0.077967000 |
| 6  | -5.598472000 | 2.617434000  | 0.895819000  |
| 6  | -5.850368000 | 1.574333000  | 1.816349000  |
| 6  | -6.030329000 | -1.849005000 | -0.577588000 |
| 6  | -5.849172000 | -2.880524000 | 0.337398000  |

|   |              |              |              |
|---|--------------|--------------|--------------|
| 6 | -4.796286000 | -2.890840000 | 1.280898000  |
| 1 | -6.176025000 | 3.529184000  | 0.979539000  |
| 1 | -6.517785000 | -3.729006000 | 0.293951000  |
| 6 | -4.361428000 | 3.764359000  | -0.974548000 |
| 9 | -3.116229000 | 4.248385000  | -0.764817000 |
| 9 | -4.461252000 | 3.435832000  | -2.275777000 |
| 9 | -5.229642000 | 4.776473000  | -0.743648000 |
| 6 | -7.160342000 | -1.992483000 | -1.616607000 |
| 9 | -8.030465000 | -0.965416000 | -1.525517000 |
| 9 | -6.658615000 | -1.995135000 | -2.868051000 |
| 9 | -7.868291000 | -3.136228000 | -1.461607000 |
| 6 | -4.656555000 | -4.077692000 | 2.200469000  |
| 1 | -5.407009000 | -4.847204000 | 1.996829000  |
| 1 | -3.652924000 | -4.501329000 | 2.089633000  |
| 1 | -4.754259000 | -3.734841000 | 3.236849000  |
| 6 | -6.903525000 | 1.781768000  | 2.876430000  |
| 1 | -7.311378000 | 2.793871000  | 2.841983000  |
| 1 | -7.713690000 | 1.058572000  | 2.728677000  |
| 1 | -6.470036000 | 1.591726000  | 3.863589000  |

MECP<sub>6-8</sub>, **5** (R<sub>1</sub>= CH<sub>3</sub>, R<sub>2</sub>=CF<sub>3</sub>)

E= -5606.83123 a.u.

|    |             |              |              |
|----|-------------|--------------|--------------|
| 26 | 4.106374000 | -0.059275000 | -0.066911000 |
| 7  | 4.137082000 | -2.089326000 | 0.859039000  |
| 7  | 4.601506000 | -3.199608000 | 0.224420000  |
| 7  | 5.703742000 | -2.107895000 | -1.806221000 |
| 7  | 5.393771000 | -0.792975000 | -1.614142000 |
| 7  | 5.635382000 | 0.585165000  | 1.296560000  |
| 7  | 6.035135000 | 1.881459000  | 1.449330000  |
| 7  | 4.688444000 | 3.038932000  | -0.384052000 |
| 7  | 4.075189000 | 1.956707000  | -0.937349000 |
| 5  | 4.788453000 | -3.277214000 | -1.322833000 |
| 1  | 3.706086000 | -3.191071000 | -1.858056000 |
| 1  | 5.343822000 | -4.314132000 | -1.582771000 |
| 5  | 5.113339000 | 3.094177000  | 1.117415000  |
| 1  | 4.119726000 | 3.050214000  | 1.808577000  |
| 1  | 5.745699000 | 4.104301000  | 1.292054000  |
| 6  | 3.943012000 | -2.434741000 | 2.143385000  |
| 1  | 3.590716000 | -1.706088000 | 2.859169000  |
| 6  | 4.276449000 | -3.777529000 | 2.350078000  |
| 1  | 4.228722000 | -4.340564000 | 3.269410000  |
| 6  | 4.690554000 | -4.222104000 | 1.099553000  |
| 1  | 5.034151000 | -5.191711000 | 0.771566000  |
| 6  | 6.817271000 | -2.198206000 | -2.556903000 |
| 1  | 7.214616000 | -3.166277000 | -2.823435000 |
| 6  | 7.260130000 | -0.915137000 | -2.867764000 |

|    |              |              |              |
|----|--------------|--------------|--------------|
| 1  | 8.125853000  | -0.638278000 | -3.449368000 |
| 6  | 6.338072000  | -0.070514000 | -2.248192000 |
| 1  | 6.304908000  | 1.008861000  | -2.215759000 |
| 6  | 6.629969000  | -0.186985000 | 1.776448000  |
| 1  | 6.541914000  | -1.263048000 | 1.744014000  |
| 6  | 7.674964000  | 0.605260000  | 2.254570000  |
| 1  | 8.605081000  | 0.280557000  | 2.694909000  |
| 6  | 7.251594000  | 1.911512000  | 2.024619000  |
| 1  | 7.729763000  | 2.856466000  | 2.235674000  |
| 6  | 4.673912000  | 4.065366000  | -1.256858000 |
| 1  | 5.104359000  | 5.017638000  | -0.985354000 |
| 6  | 4.040417000  | 3.652792000  | -2.424757000 |
| 1  | 3.864648000  | 4.228837000  | -3.320052000 |
| 6  | 3.684885000  | 2.325280000  | -2.171086000 |
| 1  | 3.181931000  | 1.622084000  | -2.818950000 |
| 8  | -2.547126000 | -0.746586000 | -0.751640000 |
| 8  | -2.391937000 | 0.282948000  | 1.655065000  |
| 6  | -1.395573000 | -0.465623000 | -0.317262000 |
| 6  | -1.307614000 | 0.099227000  | 1.033175000  |
| 6  | -0.218933000 | -1.156520000 | -2.407082000 |
| 6  | 0.974625000  | -1.330489000 | -3.087775000 |
| 6  | -0.184470000 | -0.670957000 | -1.090672000 |
| 6  | 2.175610000  | -1.021684000 | -2.439140000 |
| 6  | 1.072317000  | -0.368139000 | -0.517457000 |
| 7  | 2.228917000  | -0.548858000 | -1.189259000 |
| 6  | -0.005564000 | 0.401194000  | 1.598923000  |
| 6  | 1.161537000  | 0.163502000  | 0.836191000  |
| 1  | -1.178664000 | -1.378066000 | -2.862436000 |
| 1  | 0.996255000  | -1.704264000 | -4.106046000 |
| 1  | 3.131845000  | -1.158494000 | -2.932773000 |
| 6  | 0.138532000  | 0.918371000  | 2.896131000  |
| 7  | 2.394569000  | 0.418874000  | 1.322146000  |
| 6  | 2.512249000  | 0.913106000  | 2.557528000  |
| 6  | 1.409702000  | 1.177092000  | 3.379568000  |
| 1  | -0.750630000 | 1.101841000  | 3.490536000  |
| 1  | 3.525215000  | 1.105987000  | 2.894924000  |
| 1  | 1.566271000  | 1.580138000  | 4.374132000  |
| 27 | -4.022127000 | -0.196886000 | 0.526609000  |
| 8  | -3.939989000 | 1.579389000  | -0.335941000 |
| 8  | -5.341047000 | 0.483540000  | 1.837590000  |
| 8  | -5.455504000 | -0.790517000 | -0.703191000 |
| 8  | -4.019093000 | -1.962395000 | 1.417813000  |
| 6  | -4.707805000 | 2.551785000  | -0.080967000 |
| 6  | -5.691696000 | 2.638837000  | 0.895318000  |
| 6  | -5.946775000 | 1.596354000  | 1.817727000  |
| 6  | -6.101069000 | -1.872706000 | -0.582930000 |



|   |              |              |              |
|---|--------------|--------------|--------------|
| 6 | -5.910919000 | -2.900629000 | 0.332285000  |
| 6 | -4.864307000 | -2.895561000 | 1.284178000  |
| 1 | -6.262748000 | 3.552754000  | 0.974482000  |
| 1 | -6.564800000 | -3.760187000 | 0.288728000  |
| 6 | -4.439596000 | 3.773792000  | -0.985912000 |
| 9 | -3.191176000 | 4.250593000  | -0.775790000 |
| 9 | -4.534898000 | 3.440368000  | -2.286789000 |
| 9 | -5.300017000 | 4.793057000  | -0.764088000 |
| 6 | -7.220861000 | -2.017578000 | -1.634854000 |
| 9 | -8.094908000 | -0.993810000 | -1.545422000 |
| 9 | -6.701287000 | -2.010117000 | -2.878917000 |
| 9 | -7.929060000 | -3.162928000 | -1.499479000 |
| 6 | -4.698266000 | -4.072722000 | 2.214683000  |
| 1 | -5.430129000 | -4.860226000 | 2.027935000  |
| 1 | -3.688531000 | -4.482784000 | 2.108421000  |
| 1 | -4.799252000 | -3.726088000 | 3.248835000  |
| 6 | -7.001142000 | 1.794510000  | 2.879220000  |
| 1 | -7.802750000 | 1.063450000  | 2.727586000  |
| 1 | -6.560583000 | 1.595868000  | 3.860897000  |
| 1 | -7.424488000 | 2.800762000  | 2.861183000  |

MECP<sub>4-6</sub>, **5** (R<sub>1</sub>= CH<sub>3</sub>, R<sub>2</sub>=CF<sub>3</sub>)

E= -5606.83539 a.u.

|    |             |              |              |
|----|-------------|--------------|--------------|
| 26 | 4.018125000 | -0.044861000 | -0.050030000 |
| 7  | 4.034194000 | -1.746122000 | 1.008963000  |
| 7  | 4.480300000 | -2.955902000 | 0.566137000  |
| 7  | 5.656203000 | -2.214997000 | -1.547780000 |
| 7  | 5.331939000 | -0.892480000 | -1.503676000 |
| 7  | 5.560710000 | 0.669546000  | 1.183914000  |
| 7  | 5.983420000 | 1.964500000  | 1.201934000  |
| 7  | 4.596477000 | 2.826484000  | -0.726634000 |
| 7  | 4.015053000 | 1.654592000  | -1.107802000 |
| 5  | 4.739512000 | -3.306394000 | -0.934150000 |
| 1  | 3.682289000 | -3.348341000 | -1.519737000 |
| 1  | 5.319925000 | -4.361732000 | -0.969948000 |
| 5  | 5.081117000 | 3.134422000  | 0.723986000  |
| 1  | 4.122055000 | 3.248476000  | 1.452292000  |
| 1  | 5.744301000 | 4.139605000  | 0.688969000  |
| 6  | 3.796804000 | -1.882234000 | 2.328271000  |
| 1  | 3.459075000 | -1.043432000 | 2.914403000  |
| 6  | 4.085851000 | -3.181882000 | 2.747451000  |
| 1  | 4.000979000 | -3.589729000 | 3.742875000  |
| 6  | 4.518248000 | -3.825982000 | 1.594235000  |
| 1  | 4.846667000 | -4.840911000 | 1.429553000  |
| 6  | 6.791070000 | -2.382695000 | -2.253106000 |
| 1  | 7.200848000 | -3.371102000 | -2.399896000 |

|    |              |              |              |
|----|--------------|--------------|--------------|
| 6  | 7.235689000  | -1.137397000 | -2.686466000 |
| 1  | 8.118260000  | -0.917104000 | -3.267124000 |
| 6  | 6.290693000  | -0.238036000 | -2.186325000 |
| 1  | 6.260496000  | 0.837928000  | -2.270903000 |
| 6  | 6.542111000  | -0.064986000 | 1.743712000  |
| 1  | 6.444463000  | -1.136959000 | 1.821804000  |
| 6  | 7.599878000  | 0.755431000  | 2.139094000  |
| 1  | 8.524843000  | 0.461302000  | 2.610793000  |
| 6  | 7.199896000  | 2.037062000  | 1.772851000  |
| 1  | 7.694765000  | 2.990942000  | 1.880828000  |
| 6  | 4.542356000  | 3.708867000  | -1.743605000 |
| 1  | 4.954269000  | 4.699005000  | -1.620059000 |
| 6  | 3.908420000  | 3.111551000  | -2.826104000 |
| 1  | 3.704802000  | 3.541366000  | -3.794932000 |
| 6  | 3.599873000  | 1.825757000  | -2.378272000 |
| 1  | 3.122610000  | 1.022150000  | -2.914594000 |
| 8  | -2.624576000 | -0.782522000 | -0.709615000 |
| 8  | -2.493567000 | 0.502053000  | 1.559946000  |
| 6  | -1.449077000 | -0.451614000 | -0.286370000 |
| 6  | -1.376158000 | 0.246042000  | 0.961011000  |
| 6  | -0.266559000 | -1.420856000 | -2.260816000 |
| 6  | 0.933810000  | -1.684610000 | -2.894068000 |
| 6  | -0.247150000 | -0.763377000 | -1.017890000 |
| 6  | 2.132111000  | -1.302187000 | -2.274463000 |
| 6  | 1.009225000  | -0.393453000 | -0.475204000 |
| 7  | 2.173883000  | -0.674207000 | -1.098092000 |
| 6  | -0.098046000 | 0.635258000  | 1.501683000  |
| 6  | 1.083774000  | 0.319486000  | 0.783336000  |
| 1  | -1.219593000 | -1.700309000 | -2.698176000 |
| 1  | 0.966122000  | -2.186613000 | -3.854920000 |
| 1  | 3.091509000  | -1.503585000 | -2.737742000 |
| 6  | 0.032885000  | 1.320144000  | 2.722482000  |
| 7  | 2.311648000  | 0.659339000  | 1.227886000  |
| 6  | 2.411600000  | 1.311566000  | 2.387063000  |
| 6  | 1.298295000  | 1.658584000  | 3.166334000  |
| 1  | -0.858794000 | 1.566517000  | 3.290032000  |
| 1  | 3.417130000  | 1.567086000  | 2.702670000  |
| 1  | 1.444572000  | 2.188859000  | 4.101182000  |
| 27 | -3.955326000 | -0.160339000 | 0.516637000  |
| 8  | -3.959453000 | 1.485931000  | -0.434792000 |
| 8  | -5.231113000 | 0.383428000  | 1.813495000  |
| 8  | -5.368091000 | -0.740267000 | -0.610357000 |
| 8  | -3.797978000 | -1.805396000 | 1.459246000  |
| 6  | -4.701704000 | 2.462247000  | -0.119374000 |
| 6  | -5.608273000 | 2.560330000  | 0.926542000  |
| 6  | -5.820805000 | 1.508232000  | 1.842406000  |

|   |              |              |              |
|---|--------------|--------------|--------------|
| 6 | -5.871898000 | -1.902252000 | -0.544925000 |
| 6 | -5.531912000 | -2.949056000 | 0.298287000  |
| 6 | -4.503313000 | -2.840028000 | 1.261136000  |
| 1 | -6.167364000 | 3.476877000  | 1.046757000  |
| 1 | -6.071464000 | -3.881303000 | 0.215491000  |
| 6 | -4.499557000 | 3.671270000  | -1.055776000 |
| 9 | -5.341162000 | 4.690454000  | -0.773963000 |
| 9 | -3.240275000 | 4.144058000  | -0.943513000 |
| 9 | -4.697626000 | 3.322951000  | -2.339045000 |
| 6 | -7.008167000 | -2.098994000 | -1.568286000 |
| 9 | -7.987123000 | -1.193843000 | -1.365051000 |
| 9 | -6.551643000 | -1.940058000 | -2.824509000 |
| 9 | -7.569356000 | -3.326250000 | -1.490651000 |
| 6 | -4.180179000 | -4.015159000 | 2.149071000  |
| 1 | -3.119738000 | -4.265718000 | 2.044572000  |
| 1 | -4.345232000 | -3.730766000 | 3.193669000  |
| 1 | -4.787341000 | -4.890087000 | 1.911435000  |
| 6 | -6.821834000 | 1.676305000  | 2.957024000  |
| 1 | -6.364280000 | 1.379090000  | 3.905027000  |
| 1 | -7.188709000 | 2.701515000  | 3.027757000  |
| 1 | -7.669698000 | 1.005451000  | 2.777956000  |

MECP<sub>2-8</sub>, **5** (R<sub>1</sub>= CH<sub>3</sub>, R<sub>2</sub>=CF<sub>3</sub>)

E= -5606.82627 a.u.

|    |             |              |              |
|----|-------------|--------------|--------------|
| 26 | 4.028112000 | -0.067798000 | -0.051434000 |
| 7  | 4.075173000 | -2.033258000 | 0.818653000  |
| 7  | 4.563705000 | -3.135723000 | 0.188436000  |
| 7  | 5.671558000 | -2.014170000 | -1.808508000 |
| 7  | 5.367969000 | -0.710615000 | -1.544883000 |
| 7  | 5.594289000 | 0.518888000  | 1.231188000  |
| 7  | 5.985547000 | 1.808365000  | 1.443030000  |
| 7  | 4.627139000 | 2.977160000  | -0.359382000 |
| 7  | 4.006543000 | 1.896343000  | -0.906547000 |
| 5  | 4.781122000 | -3.209729000 | -1.353899000 |
| 1  | 3.706245000 | -3.163276000 | -1.909109000 |
| 1  | 5.371453000 | -4.229964000 | -1.601181000 |
| 5  | 5.079323000 | 3.035966000  | 1.131329000  |
| 1  | 4.100541000 | 3.021389000  | 1.843742000  |
| 1  | 5.735240000 | 4.033933000  | 1.286279000  |
| 6  | 3.861556000 | -2.385764000 | 2.099246000  |
| 1  | 3.492328000 | -1.664072000 | 2.812042000  |
| 6  | 4.208089000 | -3.724256000 | 2.306290000  |
| 1  | 4.152204000 | -4.290279000 | 3.223484000  |
| 6  | 4.649878000 | -4.159108000 | 1.061417000  |
| 1  | 5.010863000 | -5.122251000 | 0.733036000  |
| 6  | 6.765319000 | -2.069830000 | -2.592961000 |

|    |              |              |              |
|----|--------------|--------------|--------------|
| 1  | 7.152099000  | -3.025364000 | -2.914886000 |
| 6  | 7.200422000  | -0.774092000 | -2.852514000 |
| 1  | 8.050263000  | -0.468760000 | -3.443514000 |
| 6  | 6.295717000  | 0.040171000  | -2.167740000 |
| 1  | 6.268222000  | 1.115966000  | -2.081268000 |
| 6  | 6.582004000  | -0.268760000 | 1.697713000  |
| 1  | 6.503126000  | -1.342374000 | 1.616972000  |
| 6  | 7.614453000  | 0.507324000  | 2.228422000  |
| 1  | 8.536288000  | 0.167100000  | 2.674573000  |
| 6  | 7.191579000  | 1.819780000  | 2.042367000  |
| 1  | 7.660336000  | 2.758602000  | 2.297701000  |
| 6  | 4.608794000  | 4.002943000  | -1.233444000 |
| 1  | 5.048348000  | 4.951953000  | -0.964240000 |
| 6  | 3.960913000  | 3.592563000  | -2.393196000 |
| 1  | 3.777190000  | 4.168394000  | -3.287426000 |
| 6  | 3.604558000  | 2.265809000  | -2.136359000 |
| 1  | 3.098725000  | 1.563644000  | -2.781591000 |
| 8  | -2.509855000 | -0.760519000 | -0.752491000 |
| 8  | -2.357293000 | 0.280216000  | 1.656489000  |
| 6  | -1.359424000 | -0.475425000 | -0.313647000 |
| 6  | -1.272822000 | 0.089603000  | 1.034682000  |
| 6  | -0.177681000 | -1.162765000 | -2.404777000 |
| 6  | 1.018962000  | -1.324370000 | -3.082363000 |
| 6  | -0.149018000 | -0.678649000 | -1.088075000 |
| 6  | 2.218196000  | -1.012725000 | -2.432620000 |
| 6  | 1.103505000  | -0.372291000 | -0.511335000 |
| 7  | 2.266535000  | -0.548849000 | -1.178785000 |
| 6  | 0.028649000  | 0.390614000  | 1.603392000  |
| 6  | 1.192788000  | 0.158266000  | 0.836151000  |
| 1  | -1.133961000 | -1.392515000 | -2.863154000 |
| 1  | 1.044527000  | -1.692658000 | -4.101946000 |
| 1  | 3.174013000  | -1.136070000 | -2.927729000 |
| 6  | 0.178247000  | 0.903589000  | 2.901196000  |
| 7  | 2.432494000  | 0.415512000  | 1.312195000  |
| 6  | 2.553548000  | 0.900113000  | 2.552384000  |
| 6  | 1.453189000  | 1.156807000  | 3.377989000  |
| 1  | -0.706750000 | 1.087110000  | 3.501588000  |
| 1  | 3.566162000  | 1.088686000  | 2.889337000  |
| 1  | 1.614801000  | 1.552934000  | 4.374578000  |
| 27 | -3.983566000 | -0.204467000 | 0.524619000  |
| 8  | -3.902389000 | 1.574356000  | -0.332974000 |
| 8  | -5.299691000 | 0.455399000  | 1.835563000  |
| 8  | -5.419062000 | -0.775653000 | -0.701018000 |
| 8  | -3.981115000 | -1.976072000 | 1.403752000  |
| 6  | -4.673895000 | 2.540654000  | -0.064833000 |
| 6  | -5.655627000 | 2.619052000  | 0.915050000  |

|   |              |              |              |
|---|--------------|--------------|--------------|
| 6 | -5.907041000 | 1.567664000  | 1.828211000  |
| 6 | -6.066823000 | -1.857108000 | -0.594199000 |
| 6 | -5.877566000 | -2.898514000 | 0.306804000  |
| 6 | -4.828742000 | -2.905668000 | 1.256956000  |
| 1 | -6.230958000 | 3.529686000  | 1.002241000  |
| 1 | -6.537153000 | -3.753212000 | 0.254874000  |
| 6 | -4.412663000 | 3.768916000  | -0.961100000 |
| 9 | -3.161534000 | 4.239511000  | -0.756759000 |
| 9 | -4.519607000 | 3.444142000  | -2.262938000 |
| 9 | -5.269519000 | 4.787509000  | -0.723601000 |
| 6 | -7.192549000 | -1.977007000 | -1.643560000 |
| 9 | -8.061986000 | -0.951598000 | -1.527214000 |
| 9 | -6.685188000 | -1.945490000 | -2.892107000 |
| 9 | -7.902356000 | -3.122887000 | -1.524595000 |
| 6 | -4.661887000 | -4.094083000 | 2.172456000  |
| 1 | -5.389930000 | -4.881937000 | 1.970861000  |
| 1 | -3.648503000 | -4.493519000 | 2.062542000  |
| 1 | -4.766170000 | -3.758141000 | 3.209895000  |
| 6 | -6.960667000 | 1.745332000  | 2.894238000  |
| 1 | -7.761571000 | 1.016275000  | 2.728166000  |
| 1 | -6.523164000 | 1.529483000  | 3.874006000  |
| 1 | -7.385138000 | 2.750648000  | 2.894685000  |

${}_{\text{LS}}\text{Co}^{\text{III}}\text{-SQ-}{}_{\text{LS}}\text{Fe}^{\text{II}}$ , **5** ( $\text{R}_1 = \text{CF}_3$ ,  $\text{R}_2 = \text{CF}_3$ )

$E = -6202.22208$  a.u.,  $E^{\text{ZPE}} = -6201.63560$  a.u.

|    |              |              |              |
|----|--------------|--------------|--------------|
| 26 | -4.377901000 | 0.000220000  | 0.000105000  |
| 7  | -4.366707000 | -1.791489000 | -0.922030000 |
| 7  | -4.872958000 | -2.943561000 | -0.397980000 |
| 7  | -6.158986000 | -1.905550000 | 1.510840000  |
| 7  | -5.822906000 | -0.607913000 | 1.263374000  |
| 7  | -5.822844000 | 0.606324000  | -1.264813000 |
| 7  | -6.161979000 | 1.903292000  | -1.511283000 |
| 7  | -4.879299000 | 2.942951000  | 0.398849000  |
| 7  | -4.370554000 | 1.791769000  | 0.922461000  |
| 5  | -5.283748000 | -3.121068000 | 1.093183000  |
| 1  | -4.290028000 | -3.191844000 | 1.778110000  |
| 1  | -5.955230000 | -4.116490000 | 1.181413000  |
| 5  | -5.289623000 | 3.120416000  | -1.092447000 |
| 1  | -4.295619000 | 3.193630000  | -1.776733000 |
| 1  | -5.963140000 | 4.114478000  | -1.180507000 |
| 6  | -4.001890000 | -2.073131000 | -2.189757000 |
| 1  | -3.588391000 | -1.310690000 | -2.828584000 |
| 6  | -4.266499000 | -3.408503000 | -2.489541000 |
| 1  | -4.084411000 | -3.925567000 | -3.418823000 |

|    |              |              |              |
|----|--------------|--------------|--------------|
| 6  | -4.822438000 | -3.920338000 | -1.322499000 |
| 1  | -5.178573000 | -4.910791000 | -1.081815000 |
| 6  | -7.299597000 | -1.944033000 | 2.229226000  |
| 1  | -7.720363000 | -2.893540000 | 2.524529000  |
| 6  | -7.729494000 | -0.643421000 | 2.459478000  |
| 1  | -8.608447000 | -0.322811000 | 2.996942000  |
| 6  | -6.776955000 | 0.157406000  | 1.825366000  |
| 1  | -6.739965000 | 1.231581000  | 1.735220000  |
| 6  | -6.774460000 | -0.160831000 | -1.828401000 |
| 1  | -6.734915000 | -1.234990000 | -1.739202000 |
| 6  | -7.728491000 | 0.638235000  | -2.462568000 |
| 1  | -8.606177000 | 0.315930000  | -3.001088000 |
| 6  | -7.302032000 | 1.939662000  | -2.230730000 |
| 1  | -7.724756000 | 2.888411000  | -2.525672000 |
| 6  | -4.830903000 | 3.919482000  | 1.323728000  |
| 1  | -5.189062000 | 4.909282000  | 1.083363000  |
| 6  | -4.273889000 | 3.408409000  | 2.490597000  |
| 1  | -4.092928000 | 3.925511000  | 3.420077000  |
| 6  | -4.006347000 | 2.073748000  | 2.190298000  |
| 1  | -3.591111000 | 1.312032000  | 2.828848000  |
| 8  | 1.981601000  | 0.564677000  | -1.176930000 |
| 8  | 1.981854000  | -0.565362000 | 1.175617000  |
| 6  | 0.818370000  | 0.304141000  | -0.642114000 |
| 6  | 0.818503000  | -0.304588000 | 0.641156000  |
| 6  | -0.494923000 | 1.192308000  | -2.581407000 |
| 6  | -1.739448000 | 1.434676000  | -3.132008000 |
| 6  | -0.418107000 | 0.608932000  | -1.302609000 |
| 6  | -2.897632000 | 1.109161000  | -2.409043000 |
| 6  | -1.637098000 | 0.306088000  | -0.642869000 |
| 7  | -2.856378000 | 0.564391000  | -1.189984000 |
| 6  | -0.417829000 | -0.608537000 | 1.302265000  |
| 6  | -1.636951000 | -0.305075000 | 0.643057000  |
| 1  | 0.420511000  | 1.433037000  | -3.111854000 |
| 1  | -1.841675000 | 1.879113000  | -4.115818000 |
| 1  | -3.881454000 | 1.283615000  | -2.823452000 |
| 6  | -0.494396000 | -1.191123000 | 2.581473000  |
| 7  | -2.856117000 | -0.562177000 | 1.190973000  |
| 6  | -2.897115000 | -1.105990000 | 2.410428000  |
| 6  | -1.738770000 | -1.432057000 | 3.132953000  |
| 1  | 0.421145000  | -1.432268000 | 3.111544000  |
| 1  | -3.880841000 | -1.279435000 | 2.825510000  |
| 1  | -1.840809000 | -1.875834000 | 4.117079000  |
| 27 | 3.351866000  | 0.000074000  | -0.000627000 |
| 8  | 3.289652000  | -1.714252000 | -0.830420000 |
| 8  | 4.712890000  | -0.481855000 | 1.253276000  |
| 8  | 4.712722000  | 0.482867000  | -1.254393000 |

|   |             |              |              |
|---|-------------|--------------|--------------|
| 8 | 3.288528000 | 1.714221000  | 0.829307000  |
| 6 | 3.991450000 | -2.696665000 | -0.468946000 |
| 6 | 4.942562000 | -2.755589000 | 0.552243000  |
| 6 | 5.224411000 | -1.631518000 | 1.331175000  |
| 6 | 5.224910000 | 1.632323000  | -1.330861000 |
| 6 | 4.942934000 | 2.755918000  | -0.551273000 |
| 6 | 3.990806000 | 2.696709000  | 0.468933000  |
| 1 | 5.468878000 | -3.679380000 | 0.737512000  |
| 1 | 5.469795000 | 3.679619000  | -0.735435000 |
| 6 | 3.700926000 | -3.966687000 | -1.298965000 |
| 9 | 4.486549000 | -5.002976000 | -0.939947000 |
| 9 | 2.418999000 | -4.346252000 | -1.129975000 |
| 9 | 3.898769000 | -3.733301000 | -2.607033000 |
| 6 | 6.280437000 | -1.737829000 | 2.452929000  |
| 9 | 6.886698000 | -2.942664000 | 2.472349000  |
| 9 | 7.231724000 | -0.800813000 | 2.293308000  |
| 9 | 5.703808000 | -1.548878000 | 3.654857000  |
| 6 | 6.281782000 | 1.739156000  | -2.451780000 |
| 9 | 7.232451000 | 0.801532000  | -2.292476000 |
| 9 | 5.705812000 | 1.551694000  | -3.654308000 |
| 9 | 6.888646000 | 2.943713000  | -2.469626000 |
| 6 | 3.699514000 | 3.966455000  | 1.299094000  |
| 9 | 3.895632000 | 3.732553000  | 2.607309000  |
| 9 | 4.485791000 | 5.002718000  | 0.941461000  |
| 9 | 2.417850000 | 4.346336000  | 1.128605000  |

LSCo<sup>III</sup>-SQ-HSFe<sup>II</sup>, **5** (R<sub>1</sub>= CF<sub>3</sub>, R<sub>2</sub>=CF<sub>3</sub>)

E= -6202.21702 a.u., E<sup>ZPE</sup>= -6201.63381 a.u.

|    |              |              |              |
|----|--------------|--------------|--------------|
| 26 | -4.529903000 | -0.001016000 | -0.000107000 |
| 7  | -4.529729000 | 1.977992000  | 0.964287000  |
| 7  | -5.094853000 | 3.091546000  | 0.421469000  |
| 7  | -6.333206000 | 2.032777000  | -1.541425000 |
| 7  | -5.957859000 | 0.726362000  | -1.419404000 |
| 7  | -5.960494000 | -0.723901000 | 1.419029000  |
| 7  | -6.339819000 | -2.029211000 | 1.540913000  |
| 7  | -5.102231000 | -3.092230000 | -0.420003000 |
| 7  | -4.534170000 | -1.980184000 | -0.962870000 |
| 5  | -5.425050000 | 3.221176000  | -1.098833000 |
| 1  | -4.393203000 | 3.198672000  | -1.730048000 |
| 1  | -6.041328000 | 4.242447000  | -1.262904000 |
| 5  | -5.434145000 | -3.220064000 | 1.100116000  |
| 1  | -4.402875000 | -3.199189000 | 1.732315000  |
| 1  | -6.052816000 | -4.239856000 | 1.264347000  |
| 6  | -4.210316000 | 2.287918000  | 2.234161000  |
| 1  | -3.757988000 | 1.550184000  | 2.880383000  |

|    |              |              |              |
|----|--------------|--------------|--------------|
| 6  | -4.564201000 | 3.608747000  | 2.522044000  |
| 1  | -4.435533000 | 4.143717000  | 3.450420000  |
| 6  | -5.121830000 | 4.079290000  | 1.337613000  |
| 1  | -5.523591000 | 5.048289000  | 1.081100000  |
| 6  | -7.508664000 | 2.101010000  | -2.192445000 |
| 1  | -7.962908000 | 3.060148000  | -2.392640000 |
| 6  | -7.927607000 | 0.810918000  | -2.507567000 |
| 1  | -8.827974000 | 0.517087000  | -3.024742000 |
| 6  | -6.925379000 | -0.014022000 | -1.996703000 |
| 1  | -6.850159000 | -1.091330000 | -2.004123000 |
| 6  | -6.926608000 | 0.019354000  | 1.994999000  |
| 1  | -6.848307000 | 1.096435000  | 2.002326000  |
| 6  | -7.931844000 | -0.802563000 | 2.504827000  |
| 1  | -8.831999000 | -0.506012000 | 3.020820000  |
| 6  | -7.516192000 | -2.093940000 | 2.190616000  |
| 1  | -7.973393000 | -3.051725000 | 2.390579000  |
| 6  | -5.130606000 | -4.080312000 | -1.335683000 |
| 1  | -5.534654000 | -5.048330000 | -1.079048000 |
| 6  | -4.570994000 | -3.611549000 | -2.519917000 |
| 1  | -4.442822000 | -4.147244000 | -3.447944000 |
| 6  | -4.214329000 | -2.291428000 | -2.232342000 |
| 1  | -3.759689000 | -1.555018000 | -2.878450000 |
| 8  | 2.069548000  | 0.539922000  | -1.185826000 |
| 8  | 2.069592000  | -0.541522000 | 1.186329000  |
| 6  | 0.909937000  | 0.289624000  | -0.648833000 |
| 6  | 0.909954000  | -0.291735000 | 0.649154000  |
| 6  | -0.384906000 | 1.133821000  | -2.608374000 |
| 6  | -1.618445000 | 1.375579000  | -3.182896000 |
| 6  | -0.328882000 | 0.575608000  | -1.317748000 |
| 6  | -2.780721000 | 1.061083000  | -2.463942000 |
| 6  | -1.554279000 | 0.286176000  | -0.661418000 |
| 7  | -2.753145000 | 0.530852000  | -1.239986000 |
| 6  | -0.328853000 | -0.578471000 | 1.317757000  |
| 6  | -1.554255000 | -0.289446000 | 0.661259000  |
| 1  | 0.540747000  | 1.360389000  | -3.127287000 |
| 1  | -1.703726000 | 1.806959000  | -4.174177000 |
| 1  | -3.764969000 | 1.243978000  | -2.881012000 |
| 6  | -0.384891000 | -1.137269000 | 2.608157000  |
| 7  | -2.753107000 | -0.534962000 | 1.239530000  |
| 6  | -2.780723000 | -1.065859000 | 2.463155000  |
| 6  | -1.618407000 | -1.380092000 | 3.182229000  |
| 1  | 0.540775000  | -1.363541000 | 3.127178000  |
| 1  | -3.764965000 | -1.249814000 | 2.879760000  |
| 1  | -1.703673000 | -1.812067000 | 4.173251000  |
| 27 | 3.445754000  | -0.000359000 | 0.000441000  |
| 8  | 3.382476000  | -1.728404000 | -0.797164000 |



|   |             |              |              |
|---|-------------|--------------|--------------|
| 8 | 4.804575000 | -0.456980000 | 1.260666000  |
| 8 | 4.804397000 | 0.457288000  | -1.259616000 |
| 8 | 3.381067000 | 1.727712000  | 0.797951000  |
| 6 | 4.095828000 | -2.700363000 | -0.428745000 |
| 6 | 5.054105000 | -2.736991000 | 0.586702000  |
| 6 | 5.327995000 | -1.601192000 | 1.350624000  |
| 6 | 5.326018000 | 1.602251000  | -1.350456000 |
| 6 | 5.050552000 | 2.738111000  | -0.587192000 |
| 6 | 4.092774000 | 2.700558000  | 0.428697000  |
| 1 | 5.590085000 | -3.653440000 | 0.780755000  |
| 1 | 5.584998000 | 3.655293000  | -0.782016000 |
| 6 | 3.810980000 | -3.983156000 | -1.241172000 |
| 9 | 4.603840000 | -5.008694000 | -0.869149000 |
| 9 | 2.531961000 | -4.367084000 | -1.064557000 |
| 9 | 4.005775000 | -3.764840000 | -2.552100000 |
| 6 | 6.389536000 | -1.681710000 | 2.469325000  |
| 9 | 6.999416000 | -2.883604000 | 2.508856000  |
| 9 | 7.336246000 | -0.744603000 | 2.285065000  |
| 9 | 5.817836000 | -1.470375000 | 3.669375000  |
| 6 | 6.387094000 | 1.683712000  | -2.469527000 |
| 9 | 7.334606000 | 0.747354000  | -2.285755000 |
| 9 | 5.815070000 | 1.472048000  | -3.669390000 |
| 9 | 6.995986000 | 2.886109000  | -2.509191000 |
| 6 | 3.806426000 | 3.983299000  | 1.240678000  |
| 9 | 4.002816000 | 3.766038000  | 2.551551000  |
| 9 | 4.597142000 | 5.010032000  | 0.867366000  |
| 9 | 2.526588000 | 4.364877000  | 1.065028000  |

$\text{HS-Co}^{\text{II}}\text{-SQ-}_{\text{LS}}\text{Fe}^{\text{III}}$ , **5** ( $\text{R}_1 = \text{CF}_3$ ,  $\text{R}_2 = \text{CF}_3$ )

$E = -6202.22567$  a.u.,  $E^{\text{ZPE}} = -6201.64213$  a.u.

|    |             |              |              |
|----|-------------|--------------|--------------|
| 26 | 4.570369000 | -0.000096000 | 0.000011000  |
| 7  | 4.501102000 | -1.916844000 | 0.620265000  |
| 7  | 5.121230000 | -2.960374000 | 0.004452000  |
| 7  | 6.427561000 | -1.610716000 | -1.687563000 |
| 7  | 5.987921000 | -0.370932000 | -1.321914000 |
| 7  | 5.987860000 | 0.369899000  | 1.322273000  |
| 7  | 6.428278000 | 1.609364000  | 1.687994000  |
| 7  | 5.123169000 | 2.959745000  | -0.004330000 |
| 7  | 4.502461000 | 1.916575000  | -0.620183000 |
| 5  | 5.631219000 | -2.933202000 | -1.465298000 |
| 1  | 4.692554000 | -2.988138000 | -2.221366000 |
| 1  | 6.391212000 | -3.851466000 | -1.619963000 |
| 5  | 5.632824000 | 2.932307000  | 1.465559000  |
| 1  | 4.693986000 | 2.987827000  | 2.221366000  |
| 1  | 6.393314000 | 3.850140000  | 1.620354000  |

|   |              |              |              |
|---|--------------|--------------|--------------|
| 6 | 3.999671000  | -2.386764000 | 1.781483000  |
| 1 | 3.480889000  | -1.738465000 | 2.467761000  |
| 6 | 4.289111000  | -3.743346000 | 1.916771000  |
| 1 | 4.018217000  | -4.395507000 | 2.732248000  |
| 6 | 5.000820000  | -4.063745000 | 0.767747000  |
| 1 | 5.415586000  | -5.001433000 | 0.429152000  |
| 6 | 7.568040000  | -1.483642000 | -2.384780000 |
| 1 | 8.063234000  | -2.361574000 | -2.772323000 |
| 6 | 7.897812000  | -0.132879000 | -2.481437000 |
| 1 | 8.751628000  | 0.304564000  | -2.974827000 |
| 6 | 6.887361000  | 0.525411000  | -1.792275000 |
| 1 | 6.766432000  | 1.579119000  | -1.599618000 |
| 6 | 6.886615000  | -0.527056000 | 1.792779000  |
| 1 | 6.765008000  | -1.580684000 | 1.600120000  |
| 6 | 7.897452000  | 0.130558000  | 2.482026000  |
| 1 | 8.750916000  | -0.307470000 | 2.975509000  |
| 6 | 7.568572000  | 1.481532000  | 2.385398000  |
| 1 | 8.064261000  | 2.359139000  | 2.773043000  |
| 6 | 5.003336000  | 4.063208000  | -0.767564000 |
| 1 | 5.418597000  | 5.000668000  | -0.428940000 |
| 6 | 4.291376000  | 3.743274000  | -1.916564000 |
| 1 | 4.020821000  | 4.395644000  | -2.731988000 |
| 6 | 4.001176000  | 2.386854000  | -1.781340000 |
| 1 | 3.482022000  | 1.738855000  | -2.467616000 |
| 8 | -1.766343000 | 0.428956000  | 1.259522000  |
| 8 | -1.766195000 | -0.429071000 | -1.260370000 |
| 6 | -0.655792000 | 0.237999000  | 0.688658000  |
| 6 | -0.655697000 | -0.237936000 | -0.689426000 |
| 6 | 0.693738000  | 0.915802000  | 2.693138000  |
| 6 | 1.938065000  | 1.097647000  | 3.267443000  |
| 6 | 0.611366000  | 0.470634000  | 1.361129000  |
| 6 | 3.096354000  | 0.847000000  | 2.516120000  |
| 6 | 1.822456000  | 0.235940000  | 0.674432000  |
| 7 | 3.039751000  | 0.431881000  | 1.247918000  |
| 6 | 0.611526000  | -0.470365000 | -1.361813000 |
| 6 | 1.822533000  | -0.235667000 | -0.674987000 |
| 1 | -0.226016000 | 1.098810000  | 3.239667000  |
| 1 | 2.041603000  | 1.434999000  | 4.292743000  |
| 1 | 4.081144000  | 0.977012000  | 2.943016000  |
| 6 | 0.694043000  | -0.915364000 | -2.693884000 |
| 7 | 3.039909000  | -0.431529000 | -1.248370000 |
| 6 | 3.096638000  | -0.846439000 | -2.516613000 |
| 6 | 1.938420000  | -1.097031000 | -3.268098000 |
| 1 | -0.225662000 | -1.098356000 | -3.240501000 |
| 1 | 4.081461000  | -0.976342000 | -2.943464000 |
| 1 | 2.042089000  | -1.434216000 | -4.293440000 |

|    |              |              |              |
|----|--------------|--------------|--------------|
| 27 | -3.407715000 | -0.000149000 | -0.000609000 |
| 8  | -3.423119000 | 1.913490000  | -0.783885000 |
| 8  | -4.829382000 | 0.644843000  | 1.340111000  |
| 8  | -4.829373000 | -0.644962000 | -1.341190000 |
| 8  | -3.423622000 | -1.913599000 | 0.783091000  |
| 6  | -4.225241000 | 2.833880000  | -0.495885000 |
| 6  | -5.231604000 | 2.840173000  | 0.479422000  |
| 6  | -5.434782000 | 1.743110000  | 1.329128000  |
| 6  | -5.435770000 | -1.742691000 | -1.329393000 |
| 6  | -5.233378000 | -2.839388000 | -0.479050000 |
| 6  | -4.226716000 | -2.833407000 | 0.495963000  |
| 1  | -5.842195000 | 3.721828000  | 0.602138000  |
| 1  | -5.844818000 | -3.720557000 | -0.601024000 |
| 6  | -4.009362000 | 4.118901000  | -1.330069000 |
| 9  | -2.777812000 | 4.631264000  | -1.093083000 |
| 9  | -4.091039000 | 3.856713000  | -2.648934000 |
| 9  | -4.905920000 | 5.093452000  | -1.054601000 |
| 6  | -6.512957000 | 1.864013000  | 2.432520000  |
| 9  | -7.205155000 | 3.025897000  | 2.374482000  |
| 9  | -7.405228000 | 0.858638000  | 2.341554000  |
| 9  | -5.944222000 | 1.798195000  | 3.656651000  |
| 6  | -4.011785000 | -4.118099000 | 1.330906000  |
| 9  | -4.092862000 | -3.854983000 | 2.649617000  |
| 9  | -4.909321000 | -5.091997000 | 1.056300000  |
| 9  | -2.780781000 | -4.631752000 | 1.093910000  |
| 6  | -6.514320000 | -1.863277000 | -2.432439000 |
| 9  | -7.405960000 | -0.857331000 | -2.341517000 |
| 9  | -5.945905000 | -1.798173000 | -3.656750000 |
| 9  | -7.207204000 | -3.024723000 | -2.373838000 |

$\text{HS-Co}^{\text{II}}\text{-BQ-HS-Fe}^{\text{II}}$ , **5** ( $\text{R}_1 = \text{CF}_3$ ,  $\text{R}_2 = \text{CF}_3$ )

$E = -6202.21727$  a.u.,  $E^{\text{ZPE}} = -6201.63780$  a.u.

|    |              |              |              |
|----|--------------|--------------|--------------|
| 26 | -4.737997000 | -0.000240000 | -0.000176000 |
| 7  | -4.729071000 | -2.079717000 | -0.681745000 |
| 7  | -5.282090000 | -3.113896000 | 0.011638000  |
| 7  | -6.516696000 | -1.800160000 | 1.813774000  |
| 7  | -6.143868000 | -0.521384000 | 1.512547000  |
| 7  | -6.143347000 | 0.524419000  | -1.511919000 |
| 7  | -6.513117000 | 1.804074000  | -1.813115000 |
| 7  | -5.275160000 | 3.114933000  | -0.011200000 |
| 7  | -4.724589000 | 2.079482000  | 0.682223000  |
| 5  | -5.607852000 | -3.036474000 | 1.535895000  |
| 1  | -4.573522000 | -2.925646000 | 2.155247000  |
| 1  | -6.218989000 | -4.026404000 | 1.841723000  |
| 5  | -5.601281000 | 3.038269000  | -1.535390000 |

|   |              |              |              |
|---|--------------|--------------|--------------|
| 1 | -4.567338000 | 2.925025000  | -2.154955000 |
| 1 | -6.210176000 | 4.029589000  | -1.841181000 |
| 6 | -4.410144000 | -2.559400000 | -1.899175000 |
| 1 | -3.967614000 | -1.915218000 | -2.644460000 |
| 6 | -4.752036000 | -3.909271000 | -2.000680000 |
| 1 | -4.620297000 | -4.565950000 | -2.846744000 |
| 6 | -5.301816000 | -4.217503000 | -0.760021000 |
| 1 | -5.693770000 | -5.145786000 | -0.371643000 |
| 6 | -7.687642000 | -1.779322000 | 2.474831000  |
| 1 | -8.139474000 | -2.702306000 | 2.806957000  |
| 6 | -8.107093000 | -0.458400000 | 2.613574000  |
| 1 | -9.004830000 | -0.097919000 | 3.091518000  |
| 6 | -7.110271000 | 0.290508000  | 1.990150000  |
| 1 | -7.037730000 | 1.359099000  | 1.852315000  |
| 6 | -7.111792000 | -0.285210000 | -1.989213000 |
| 1 | -7.041801000 | -1.353961000 | -1.851261000 |
| 6 | -8.106929000 | 0.466067000  | -2.612470000 |
| 1 | -9.005641000 | 0.107722000  | -3.090184000 |
| 6 | -7.684251000 | 1.785985000  | -2.473921000 |
| 1 | -8.133934000 | 2.710033000  | -2.806005000 |
| 6 | -5.292772000 | 4.218507000  | 0.760596000  |
| 1 | -5.682694000 | 5.147655000  | 0.372243000  |
| 6 | -4.743965000 | 3.908954000  | 2.001339000  |
| 1 | -4.611034000 | 4.565249000  | 2.847515000  |
| 6 | -4.404990000 | 2.558329000  | 1.899780000  |
| 1 | -3.964196000 | 1.913080000  | 2.645172000  |
| 8 | 1.840624000  | -0.397456000 | 1.263166000  |
| 8 | 1.840294000  | 0.397276000  | -1.264675000 |
| 6 | 0.741958000  | -0.221511000 | 0.718016000  |
| 6 | 0.741775000  | 0.220723000  | -0.719428000 |
| 6 | -0.595336000 | -0.802477000 | 2.741944000  |
| 6 | -1.834962000 | -0.962628000 | 3.339358000  |
| 6 | -0.535086000 | -0.414743000 | 1.396323000  |
| 6 | -2.985146000 | -0.733502000 | 2.578273000  |
| 6 | -1.745318000 | -0.203434000 | 0.699489000  |
| 7 | -2.947025000 | -0.363250000 | 1.292344000  |
| 6 | -0.535468000 | 0.413216000  | -1.397611000 |
| 6 | -1.745538000 | 0.201589000  | -0.700561000 |
| 1 | 0.330553000  | -0.964708000 | 3.284910000  |
| 1 | -1.928210000 | -1.263762000 | 4.376696000  |
| 1 | -3.974309000 | -0.850554000 | 3.006954000  |
| 6 | -0.596073000 | 0.800545000  | -2.743304000 |
| 7 | -2.947428000 | 0.360821000  | -1.293203000 |
| 6 | -2.985834000 | 0.730643000  | -2.579280000 |
| 6 | -1.835876000 | 0.959942000  | -3.340606000 |
| 1 | 0.329662000  | 0.963027000  | -3.286459000 |

|    |              |              |              |
|----|--------------|--------------|--------------|
| 1  | -3.975090000 | 0.847093000  | -3.007921000 |
| 1  | -1.929398000 | 1.260687000  | -4.378031000 |
| 27 | 3.555294000  | 0.000155000  | -0.000863000 |
| 8  | 3.517892000  | 1.896630000  | 0.765708000  |
| 8  | 4.943137000  | 0.654600000  | -1.346478000 |
| 8  | 4.943465000  | -0.654348000 | 1.344660000  |
| 8  | 3.517188000  | -1.896700000 | -0.766738000 |
| 6  | 4.334278000  | 2.818588000  | 0.511900000  |
| 6  | 5.357185000  | 2.830442000  | -0.444025000 |
| 6  | 5.560191000  | 1.748062000  | -1.312092000 |
| 6  | 5.559008000  | -1.748679000 | 1.311621000  |
| 6  | 5.354736000  | -2.831753000 | 0.444693000  |
| 6  | 4.332221000  | -2.819496000 | -0.511635000 |
| 1  | 5.976921000  | 3.708788000  | -0.543280000 |
| 1  | 5.973242000  | -3.710836000 | 0.545088000  |
| 6  | 4.109697000  | 4.088125000  | 1.365395000  |
| 9  | 2.883100000  | 4.604450000  | 1.119879000  |
| 9  | 4.173941000  | 3.798007000  | 2.678740000  |
| 9  | 5.013034000  | 5.061297000  | 1.117633000  |
| 6  | 6.646988000  | 1.877333000  | -2.405390000 |
| 9  | 7.343740000  | 3.032953000  | -2.322305000 |
| 9  | 7.529680000  | 0.863974000  | -2.319663000 |
| 9  | 6.084798000  | 1.832366000  | -3.632269000 |
| 6  | 4.106314000  | -4.089587000 | -1.363955000 |
| 9  | 4.171854000  | -3.800918000 | -2.677570000 |
| 9  | 5.008036000  | -5.063845000 | -1.114600000 |
| 9  | 2.878787000  | -4.603846000 | -1.118738000 |
| 6  | 6.645345000  | -1.878284000 | 2.405350000  |
| 9  | 7.529006000  | -0.865808000 | 2.319330000  |
| 9  | 6.082772000  | -1.832062000 | 3.632020000  |
| 9  | 7.341044000  | -3.034605000 | 2.323211000  |

${}_{\text{LS}}\text{Co}^{\text{III}}\text{-SQ-}{}_{\text{LS}}\text{Fe}^{\text{II}}$ , **6** (R=Ph)

E= -5583.55901 a.u., E<sup>ZPE</sup>= -5582.71262 a.u.

|    |              |              |              |
|----|--------------|--------------|--------------|
| 26 | -4.038710000 | 0.000000000  | -0.000002000 |
| 7  | -4.043754000 | 2.017474000  | 0.316210000  |
| 7  | -4.580112000 | 2.938038000  | -0.530320000 |
| 7  | -5.861490000 | 1.336656000  | -2.012705000 |
| 7  | -5.501280000 | 0.177260000  | -1.391746000 |
| 7  | -5.501278000 | -0.177256000 | 1.391745000  |
| 7  | -5.861489000 | -1.336651000 | 2.012704000  |
| 7  | -4.580112000 | -2.938036000 | 0.530324000  |
| 7  | -4.043761000 | -2.017474000 | -0.316212000 |
| 5  | -4.998393000 | 2.628947000  | -1.997813000 |
| 1  | -4.006306000 | 2.492354000  | -2.678511000 |

|   |              |              |              |
|---|--------------|--------------|--------------|
| 1 | -5.680330000 | 3.541460000  | -2.392795000 |
| 5 | -4.998391000 | -2.628940000 | 1.997817000  |
| 1 | -4.006303000 | -2.492343000 | 2.678514000  |
| 1 | -5.680327000 | -3.541453000 | 2.392803000  |
| 6 | -3.673081000 | 2.687250000  | 1.422864000  |
| 1 | -3.243346000 | 2.168213000  | 2.264213000  |
| 6 | -3.962774000 | 4.049235000  | 1.296276000  |
| 1 | -3.791028000 | 4.832636000  | 2.018446000  |
| 6 | -4.541437000 | 4.160146000  | 0.038768000  |
| 1 | -4.923303000 | 5.017592000  | -0.494866000 |
| 6 | -7.007108000 | 1.144716000  | -2.700323000 |
| 1 | -7.444218000 | 1.957392000  | -3.261058000 |
| 6 | -7.416140000 | -0.171004000 | -2.529223000 |
| 1 | -8.293844000 | -0.649170000 | -2.936149000 |
| 6 | -6.444406000 | -0.732403000 | -1.694836000 |
| 1 | -6.388631000 | -1.730127000 | -1.288770000 |
| 6 | -6.444399000 | 0.732411000  | 1.694840000  |
| 1 | -6.388621000 | 1.730135000  | 1.288776000  |
| 6 | -7.416136000 | 0.171012000  | 2.529223000  |
| 1 | -8.293840000 | 0.649179000  | 2.936149000  |
| 6 | -7.007108000 | -1.144710000 | 2.700320000  |
| 1 | -7.444220000 | -1.957386000 | 3.261053000  |
| 6 | -4.541440000 | -4.160145000 | -0.038761000 |
| 1 | -4.923306000 | -5.017590000 | 0.494875000  |
| 6 | -3.962778000 | -4.049238000 | -1.296270000 |
| 1 | -3.791032000 | -4.832641000 | -2.018438000 |
| 6 | -3.673086000 | -2.687253000 | -1.422863000 |
| 1 | -3.243353000 | -2.168218000 | -2.264214000 |
| 8 | 2.300687000  | -0.125882000 | 1.298680000  |
| 8 | 2.300687000  | 0.125883000  | -1.298683000 |
| 6 | 1.156483000  | -0.076646000 | 0.716021000  |
| 6 | 1.156484000  | 0.076647000  | -0.716024000 |
| 6 | -0.165780000 | -0.309901000 | 2.836935000  |
| 6 | -1.416265000 | -0.370554000 | 3.427708000  |
| 6 | -0.091748000 | -0.161078000 | 1.442100000  |
| 6 | -2.566658000 | -0.291635000 | 2.632999000  |
| 6 | -1.298787000 | -0.086730000 | 0.715335000  |
| 7 | -2.520827000 | -0.158805000 | 1.300351000  |
| 6 | -0.091747000 | 0.161077000  | -1.442104000 |
| 6 | -1.298787000 | 0.086729000  | -0.715339000 |
| 1 | 0.748755000  | -0.367617000 | 3.417153000  |
| 1 | -1.525432000 | -0.483259000 | 4.500962000  |
| 1 | -3.554753000 | -0.332493000 | 3.071825000  |
| 6 | -0.165780000 | 0.309896000  | -2.836940000 |
| 7 | -2.520827000 | 0.158800000  | -1.300356000 |
| 6 | -2.566657000 | 0.291626000  | -2.633005000 |

|    |              |              |              |
|----|--------------|--------------|--------------|
| 6  | -1.416264000 | 0.370545000  | -3.427713000 |
| 1  | 0.748756000  | 0.367611000  | -3.417158000 |
| 1  | -3.554752000 | 0.332480000  | -3.071831000 |
| 1  | -1.525430000 | 0.483245000  | -4.500967000 |
| 27 | 3.756710000  | 0.000000000  | -0.000001000 |
| 7  | 3.751991000  | 1.974788000  | 0.041477000  |
| 8  | 5.061462000  | -0.116218000 | -1.350195000 |
| 8  | 5.061460000  | 0.116216000  | 1.350195000  |
| 7  | 3.751985000  | -1.974789000 | -0.041480000 |
| 6  | 5.644616000  | 0.855500000  | -1.988810000 |
| 6  | 5.384457000  | 2.242299000  | -1.764317000 |
| 6  | 4.470268000  | 2.695346000  | -0.765800000 |
| 1  | 4.389567000  | 3.780448000  | -0.658894000 |
| 6  | 2.912450000  | 2.678965000  | 0.966044000  |
| 6  | 3.134744000  | 2.553292000  | 2.341539000  |
| 6  | 2.330969000  | 3.257619000  | 3.234190000  |
| 1  | 2.514280000  | 3.170390000  | 4.301398000  |
| 6  | 1.297119000  | 4.074112000  | 2.767761000  |
| 6  | 1.070098000  | 4.187207000  | 1.397191000  |
| 1  | 0.262227000  | 4.810411000  | 1.025493000  |
| 6  | 1.875740000  | 3.490854000  | 0.494308000  |
| 1  | 1.696083000  | 3.563848000  | -0.574357000 |
| 6  | 5.644600000  | -0.855504000 | 1.988822000  |
| 6  | 5.384433000  | -2.242302000 | 1.764332000  |
| 6  | 4.470252000  | -2.695347000 | 0.765806000  |
| 1  | 4.389549000  | -3.780449000 | 0.658901000  |
| 6  | 2.912452000  | -2.678963000 | -0.966055000 |
| 6  | 3.134754000  | -2.553284000 | -2.341548000 |
| 1  | 3.934158000  | -1.906143000 | -2.683303000 |
| 6  | 2.330986000  | -3.257608000 | -3.234207000 |
| 1  | 2.514304000  | -3.170374000 | -4.301413000 |
| 6  | 1.297134000  | -4.074104000 | -2.767787000 |
| 6  | 1.070105000  | -4.187205000 | -1.397220000 |
| 1  | 0.262232000  | -4.810411000 | -1.025529000 |
| 6  | 1.875740000  | -3.490855000 | -0.494329000 |
| 1  | 1.696076000  | -3.563853000 | 0.574335000  |
| 1  | 3.934147000  | 1.906154000  | 2.683302000  |
| 6  | 6.071112000  | 3.218520000  | -2.529240000 |
| 6  | 6.989057000  | 2.865967000  | -3.494740000 |
| 6  | 6.605051000  | -0.519441000 | 2.982719000  |
| 6  | 7.250496000  | -1.497433000 | 3.711738000  |
| 6  | 6.071073000  | -3.218525000 | 2.529266000  |
| 6  | 6.989010000  | -2.865974000 | 3.494774000  |
| 6  | 6.605076000  | 0.519435000  | -2.982700000 |
| 6  | 7.250536000  | 1.497425000  | -3.711707000 |
| 1  | 6.813133000  | 0.533538000  | 3.143324000  |

|   |             |              |              |
|---|-------------|--------------|--------------|
| 1 | 7.977672000 | -1.203687000 | 4.464529000  |
| 1 | 7.505560000 | -3.624339000 | 4.073155000  |
| 1 | 5.858158000 | -4.267665000 | 2.336351000  |
| 1 | 6.813152000 | -0.533545000 | -3.143307000 |
| 1 | 7.977717000 | 1.203678000  | -4.464492000 |
| 1 | 7.505618000 | 3.624331000  | -4.073112000 |
| 1 | 5.858203000 | 4.267661000  | -2.336323000 |
| 1 | 0.671470000 | 4.616790000  | 3.470140000  |
| 1 | 0.671490000 | -4.616780000 | -3.470173000 |

${}_{\text{LS}}\text{Co}^{\text{III}}\text{-SQ-}_{\text{HS}}\text{Fe}^{\text{II}}$ , **6** (R=Ph)

E= -5583.55286 a.u.,  $E^{\text{ZPE}}$ = -5582.71079 a.u.

|    |             |              |              |
|----|-------------|--------------|--------------|
| 26 | 4.202180000 | 0.012603000  | -0.004148000 |
| 7  | 4.266210000 | 2.201607000  | -0.434791000 |
| 7  | 4.849495000 | 3.119703000  | 0.381650000  |
| 7  | 6.028898000 | 1.564962000  | 2.027811000  |
| 7  | 5.629922000 | 0.336678000  | 1.587090000  |
| 7  | 5.621447000 | -0.381572000 | -1.582892000 |
| 7  | 5.962229000 | -1.627142000 | -2.023450000 |
| 7  | 4.704822000 | -3.130709000 | -0.386868000 |
| 7  | 4.174042000 | -2.187186000 | 0.435950000  |
| 5  | 5.146521000 | 2.842955000  | 1.889610000  |
| 1  | 4.100026000 | 2.680232000  | 2.476443000  |
| 1  | 5.773368000 | 3.776691000  | 2.323473000  |
| 5  | 5.018483000 | -2.862259000 | -1.892465000 |
| 1  | 3.983854000 | -2.646222000 | -2.482431000 |
| 1  | 5.601537000 | -3.822649000 | -2.329177000 |
| 6  | 3.996606000 | 2.832217000  | -1.590142000 |
| 1  | 3.541326000 | 2.297153000  | -2.411012000 |
| 6  | 4.402612000 | 4.170633000  | -1.529912000 |
| 1  | 4.325227000 | 4.925002000  | -2.298107000 |
| 6  | 4.938322000 | 4.306158000  | -0.253988000 |
| 1  | 5.366187000 | 5.161737000  | 0.247239000  |
| 6  | 7.208579000 | 1.451961000  | 2.667235000  |
| 1  | 7.679835000 | 2.324467000  | 3.095116000  |
| 6  | 7.606360000 | 0.118412000  | 2.648319000  |
| 1  | 8.504081000 | -0.308964000 | 3.068115000  |
| 6  | 6.585879000 | -0.537059000 | 1.955447000  |
| 1  | 6.491026000 | -1.580985000 | 1.695049000  |
| 6  | 6.619152000 | 0.446409000  | -1.946572000 |
| 1  | 6.573407000 | 1.493540000  | -1.685332000 |
| 6  | 7.609055000 | -0.256387000 | -2.636994000 |
| 1  | 8.527503000 | 0.128033000  | -3.053418000 |
| 6  | 7.148114000 | -1.569492000 | -2.658615000 |
| 1  | 7.578640000 | -2.463014000 | -3.085996000 |



|    |              |              |              |
|----|--------------|--------------|--------------|
| 6  | 4.735869000  | -4.323243000 | 0.243689000  |
| 1  | 5.118665000  | -5.197003000 | -0.262556000 |
| 6  | 4.213498000  | -4.165643000 | 1.522261000  |
| 1  | 4.101508000  | -4.917984000 | 2.288212000  |
| 6  | 3.878641000  | -2.807588000 | 1.590125000  |
| 1  | 3.457235000  | -2.253275000 | 2.416323000  |
| 8  | -2.399597000 | 0.174088000  | 1.292964000  |
| 8  | -2.400704000 | -0.134519000 | -1.299583000 |
| 6  | -1.255976000 | 0.118828000  | 0.707621000  |
| 6  | -1.256503000 | -0.064449000 | -0.717125000 |
| 6  | 0.048289000  | 0.414368000  | 2.817325000  |
| 6  | 1.283940000  | 0.507166000  | 3.432390000  |
| 6  | -0.006463000 | 0.223940000  | 1.426186000  |
| 6  | 2.442549000  | 0.406494000  | 2.651363000  |
| 6  | 1.213459000  | 0.132411000  | 0.713099000  |
| 7  | 2.412081000  | 0.221265000  | 1.329875000  |
| 6  | -0.007171000 | -0.157425000 | -1.438222000 |
| 6  | 1.213400000  | -0.065281000 | -0.726210000 |
| 1  | -0.878498000 | 0.484291000  | 3.376981000  |
| 1  | 1.371613000  | 0.660721000  | 4.502546000  |
| 1  | 3.429371000  | 0.483930000  | 3.095296000  |
| 6  | 0.046371000  | -0.339803000 | -2.830300000 |
| 7  | 2.412287000  | -0.151577000 | -1.342999000 |
| 6  | 2.440865000  | -0.329236000 | -2.665796000 |
| 6  | 1.282005000  | -0.425062000 | -3.446769000 |
| 1  | -0.880728000 | -0.409098000 | -3.389508000 |
| 1  | 3.426982000  | -0.404818000 | -3.111627000 |
| 1  | 1.369297000  | -0.571098000 | -4.518020000 |
| 27 | -3.854807000 | 0.002217000  | -0.000236000 |
| 7  | -3.825469000 | -1.971052000 | 0.085146000  |
| 8  | -5.164767000 | 0.071638000  | -1.349088000 |
| 8  | -5.155505000 | -0.099813000 | 1.355189000  |
| 7  | -3.872765000 | 1.975248000  | -0.085781000 |
| 6  | -5.744461000 | -0.921204000 | -1.957359000 |
| 6  | -5.469779000 | -2.299513000 | -1.699610000 |
| 6  | -4.541867000 | -2.718602000 | -0.698839000 |
| 1  | -4.446843000 | -3.799956000 | -0.568104000 |
| 6  | -2.968348000 | -2.643507000 | 1.017149000  |
| 6  | -3.186041000 | -2.498375000 | 2.391414000  |
| 6  | -2.363328000 | -3.170621000 | 3.291624000  |
| 1  | -2.542930000 | -3.068656000 | 4.358184000  |
| 6  | -1.315129000 | -3.973510000 | 2.833626000  |
| 6  | -1.093028000 | -4.106000000 | 1.463998000  |
| 1  | -0.274139000 | -4.718735000 | 1.098950000  |
| 6  | -1.918125000 | -3.442642000 | 0.553752000  |
| 1  | -1.743482000 | -3.531445000 | -0.514535000 |

|   |              |              |              |
|---|--------------|--------------|--------------|
| 6 | -5.740099000 | 0.879187000  | 1.980838000  |
| 6 | -5.493140000 | 2.263645000  | 1.727701000  |
| 6 | -4.591826000 | 2.705153000  | 0.712388000  |
| 1 | -4.523482000 | 3.788597000  | 0.582398000  |
| 6 | -3.047811000 | 2.667963000  | -1.031637000 |
| 6 | -3.275059000 | 2.505740000  | -2.402518000 |
| 1 | -4.066834000 | 1.839173000  | -2.724041000 |
| 6 | -2.486324000 | 3.199912000  | -3.316271000 |
| 1 | -2.674038000 | 3.084290000  | -4.380030000 |
| 6 | -1.462159000 | 4.042510000  | -2.875503000 |
| 6 | -1.229868000 | 4.191930000  | -1.509303000 |
| 1 | -0.429433000 | 4.835808000  | -1.157150000 |
| 6 | -2.020594000 | 3.506016000  | -0.585483000 |
| 1 | -1.836627000 | 3.607580000  | 0.480121000  |
| 1 | -3.996364000 | -1.861336000 | 2.726510000  |
| 6 | -6.153709000 | -3.301150000 | -2.433508000 |
| 6 | -7.082793000 | -2.981815000 | -3.399912000 |
| 6 | -6.689465000 | 0.554691000  | 2.989273000  |
| 6 | -7.336893000 | 1.541197000  | 3.704835000  |
| 6 | -6.181762000 | 3.248715000  | 2.479483000  |
| 6 | -7.088573000 | 2.907421000  | 3.459424000  |
| 6 | -6.715712000 | -0.619548000 | -2.951883000 |
| 6 | -7.358271000 | -1.621676000 | -3.649974000 |
| 1 | -6.887452000 | -0.496685000 | 3.171718000  |
| 1 | -8.055277000 | 1.256097000  | 4.469308000  |
| 1 | -7.606589000 | 3.672580000  | 4.027459000  |
| 1 | -5.979556000 | 4.295681000  | 2.264428000  |
| 1 | -6.934370000 | 0.427088000  | -3.137954000 |
| 1 | -8.094154000 | -1.353886000 | -4.403988000 |
| 1 | -7.597217000 | -3.759431000 | -3.954130000 |
| 1 | -5.929622000 | -4.343061000 | -2.215590000 |
| 1 | -0.674460000 | -4.490663000 | 3.541618000  |
| 1 | -0.848046000 | 4.577076000  | -3.594022000 |

$\text{HS}^{\text{Co}^{\text{II}}}\text{-BQ-}_{\text{LS}}\text{Fe}^{\text{II}}$ , **6** (R=Ph)

E= -5583.53789 a.u.,  $E^{\text{ZPE}}$ = -5582.69540 a.u.

|    |             |              |              |
|----|-------------|--------------|--------------|
| 26 | 4.103642000 | -0.045808000 | -0.009066000 |
| 7  | 4.065373000 | 1.933138000  | -0.512228000 |
| 7  | 4.586496000 | 2.938359000  | 0.242724000  |
| 7  | 5.919204000 | 1.506615000  | 1.845995000  |
| 7  | 5.582531000 | 0.288510000  | 1.333154000  |
| 7  | 5.545759000 | -0.327578000 | -1.403492000 |
| 7  | 5.910070000 | -1.533443000 | -1.926240000 |
| 7  | 4.694155000 | -3.008903000 | -0.270547000 |
| 7  | 4.154857000 | -2.022821000 | 0.496621000  |

|   |              |              |              |
|---|--------------|--------------|--------------|
| 5 | 5.023226000  | 2.770779000  | 1.727416000  |
| 1 | 4.039602000  | 2.669221000  | 2.426790000  |
| 1 | 5.683741000  | 3.730930000  | 2.035228000  |
| 5 | 5.070052000  | -2.831894000 | -1.770501000 |
| 1 | 4.058307000  | -2.773819000 | -2.433768000 |
| 1 | 5.756976000  | -3.766421000 | -2.098728000 |
| 6 | 3.676110000  | 2.491032000  | -1.673545000 |
| 1 | 3.252560000  | 1.889674000  | -2.461578000 |
| 6 | 3.938624000  | 3.864093000  | -1.674335000 |
| 1 | 3.746772000  | 4.574248000  | -2.463948000 |
| 6 | 4.520370000  | 4.101749000  | -0.436030000 |
| 1 | 4.886835000  | 5.012136000  | 0.014190000  |
| 6 | 7.079368000  | 1.404869000  | 2.528379000  |
| 1 | 7.502373000  | 2.274173000  | 3.009351000  |
| 6 | 7.522264000  | 0.090520000  | 2.464073000  |
| 1 | 8.418716000  | -0.327208000 | 2.895850000  |
| 6 | 6.554897000  | -0.566385000 | 1.697257000  |
| 1 | 6.521369000  | -1.596563000 | 1.379055000  |
| 6 | 6.469579000  | 0.563199000  | -1.806219000 |
| 1 | 6.408033000  | 1.592474000  | -1.489478000 |
| 6 | 7.432169000  | -0.058329000 | -2.607675000 |
| 1 | 8.294531000  | 0.392519000  | -3.074177000 |
| 6 | 7.038724000  | -1.389082000 | -2.652354000 |
| 1 | 7.477229000  | -2.243112000 | -3.146632000 |
| 6 | 4.698205000  | -4.170741000 | 0.414257000  |
| 1 | 5.087526000  | -5.067360000 | -0.044283000 |
| 6 | 4.145701000  | -3.951638000 | 1.669141000  |
| 1 | 4.006233000  | -4.665618000 | 2.466207000  |
| 6 | 3.825380000  | -2.591037000 | 1.671296000  |
| 1 | 3.400585000  | -2.004690000 | 2.469871000  |
| 8 | -2.207773000 | 0.214947000  | 1.341261000  |
| 8 | -2.241930000 | -0.300574000 | -1.193770000 |
| 6 | -1.091276000 | 0.095849000  | 0.785769000  |
| 6 | -1.105500000 | -0.202620000 | -0.657506000 |
| 6 | 0.277610000  | 0.505198000  | 2.849597000  |
| 6 | 1.538495000  | 0.611064000  | 3.414604000  |
| 6 | 0.182638000  | 0.233716000  | 1.477326000  |
| 6 | 2.672496000  | 0.460288000  | 2.610134000  |
| 6 | 1.373444000  | 0.086225000  | 0.739303000  |
| 7 | 2.604569000  | 0.209576000  | 1.293119000  |
| 6 | 0.142550000  | -0.362627000 | -1.380218000 |
| 6 | 1.354384000  | -0.219904000 | -0.674448000 |
| 1 | -0.629307000 | 0.619269000  | 3.433882000  |
| 1 | 1.666046000  | 0.817052000  | 4.471742000  |
| 1 | 3.668334000  | 0.537525000  | 3.025934000  |
| 6 | 0.200775000  | -0.638431000 | -2.754768000 |

|    |              |              |              |
|----|--------------|--------------|--------------|
| 7  | 2.569612000  | -0.343511000 | -1.261297000 |
| 6  | 2.601932000  | -0.600321000 | -2.578598000 |
| 6  | 1.445869000  | -0.753713000 | -3.351022000 |
| 1  | -0.721077000 | -0.745437000 | -3.316287000 |
| 1  | 3.585798000  | -0.677601000 | -3.021540000 |
| 1  | 1.544584000  | -0.964042000 | -4.410410000 |
| 27 | -3.908445000 | 0.015213000  | -0.021122000 |
| 7  | -4.081122000 | -2.096903000 | 0.303168000  |
| 8  | -5.118032000 | -0.151299000 | -1.535470000 |
| 8  | -5.102300000 | 0.381799000  | 1.444869000  |
| 7  | -3.764227000 | 2.162733000  | -0.323652000 |
| 6  | -5.738298000 | -1.166310000 | -2.057368000 |
| 6  | -5.595982000 | -2.514384000 | -1.585868000 |
| 6  | -4.782716000 | -2.879339000 | -0.460940000 |
| 1  | -4.789521000 | -3.948903000 | -0.220811000 |
| 6  | -3.333704000 | -2.719048000 | 1.346253000  |
| 6  | -3.478016000 | -2.259845000 | 2.661980000  |
| 6  | -2.763323000 | -2.868985000 | 3.690100000  |
| 1  | -2.894663000 | -2.520447000 | 4.710726000  |
| 6  | -1.883044000 | -3.919777000 | 3.419307000  |
| 6  | -1.721953000 | -4.361982000 | 2.106817000  |
| 1  | -1.029346000 | -5.168134000 | 1.882733000  |
| 6  | -2.444494000 | -3.767134000 | 1.071877000  |
| 1  | -2.304733000 | -4.097428000 | 0.046527000  |
| 6  | -5.437085000 | 1.461185000  | 2.087953000  |
| 6  | -5.023484000 | 2.775158000  | 1.690817000  |
| 6  | -4.238766000 | 3.032018000  | 0.514514000  |
| 1  | -4.058585000 | 4.093504000  | 0.307701000  |
| 6  | -2.997933000 | 2.667346000  | -1.415131000 |
| 6  | -3.303994000 | 2.248580000  | -2.716824000 |
| 1  | -4.118236000 | 1.546141000  | -2.856370000 |
| 6  | -2.566468000 | 2.737364000  | -3.792052000 |
| 1  | -2.821199000 | 2.423100000  | -4.800447000 |
| 6  | -1.505736000 | 3.623107000  | -3.584370000 |
| 6  | -1.184552000 | 4.020056000  | -2.286779000 |
| 1  | -0.349130000 | 4.691481000  | -2.110783000 |
| 6  | -1.927559000 | 3.547975000  | -1.204183000 |
| 1  | -1.664012000 | 3.842026000  | -0.192165000 |
| 1  | -4.156482000 | -1.436318000 | 2.853817000  |
| 6  | -6.302823000 | -3.554228000 | -2.236014000 |
| 6  | -7.132263000 | -3.310137000 | -3.312540000 |
| 6  | -6.264704000 | 1.347822000  | 3.237612000  |
| 6  | -6.643690000 | 2.461242000  | 3.962493000  |
| 6  | -5.437427000 | 3.890583000  | 2.454996000  |
| 6  | -6.228921000 | 3.750464000  | 3.578865000  |
| 6  | -6.607313000 | -0.945193000 | -3.161844000 |

|   |              |              |              |
|---|--------------|--------------|--------------|
| 6 | -7.280614000 | -1.986372000 | -3.769564000 |
| 1 | -6.588604000 | 0.351680000  | 3.522424000  |
| 1 | -7.274467000 | 2.338261000  | 4.839115000  |
| 1 | -6.532946000 | 4.619990000  | 4.152052000  |
| 1 | -5.118623000 | 4.880875000  | 2.136850000  |
| 1 | -6.722433000 | 0.077769000  | -3.506392000 |
| 1 | -7.935694000 | -1.779153000 | -4.611920000 |
| 1 | -7.664639000 | -4.122729000 | -3.795541000 |
| 1 | -6.182099000 | -4.569680000 | -1.864714000 |
| 1 | -1.323742000 | -4.386185000 | 4.224858000  |
| 1 | -0.930017000 | 3.994406000  | -4.427023000 |

${}_{\text{HS}}\text{Co}^{\text{II}}\text{-BQ-}{}_{\text{HS}}\text{Fe}^{\text{II}}$ , **6** (R=Ph)

E= -5583.53140 a.u., E<sup>ZPE</sup>= -5582.69340 a.u.

|    |              |              |              |
|----|--------------|--------------|--------------|
| 26 | -4.280200000 | 0.000027000  | 0.000152000  |
| 7  | -4.298124000 | 2.165548000  | 0.568050000  |
| 7  | -4.857757000 | 3.144597000  | -0.191527000 |
| 7  | -6.073551000 | 1.715406000  | -1.923593000 |
| 7  | -5.699021000 | 0.453353000  | -1.563589000 |
| 7  | -5.699145000 | -0.453137000 | 1.563724000  |
| 7  | -6.073868000 | -1.715114000 | 1.923765000  |
| 7  | -4.858226000 | -3.144546000 | 0.191773000  |
| 7  | -4.298500000 | -2.165592000 | -0.567839000 |
| 5  | -5.163942000 | 2.964322000  | -1.711556000 |
| 1  | -4.122768000 | 2.814676000  | -2.311705000 |
| 1  | -5.771392000 | 3.934703000  | -2.088407000 |
| 5  | -5.164410000 | -2.964161000 | 1.711781000  |
| 1  | -4.123240000 | -2.814555000 | 2.311930000  |
| 1  | -5.771986000 | -3.934440000 | 2.088686000  |
| 6  | -4.014430000 | 2.719271000  | 1.758738000  |
| 1  | -3.574225000 | 2.125572000  | 2.546972000  |
| 6  | -4.386467000 | 4.068871000  | 1.778591000  |
| 1  | -4.289881000 | 4.774001000  | 2.590109000  |
| 6  | -4.917655000 | 4.293352000  | 0.513730000  |
| 1  | -5.324503000 | 5.187322000  | 0.064789000  |
| 6  | -7.255709000 | 1.667056000  | -2.566339000 |
| 1  | -7.709884000 | 2.574486000  | -2.936056000 |
| 6  | -7.680055000 | 0.343247000  | -2.632635000 |
| 1  | -8.586372000 | -0.038271000 | -3.077345000 |
| 6  | -6.672702000 | -0.375864000 | -1.985590000 |
| 1  | -6.598839000 | -1.436340000 | -1.794230000 |
| 6  | -6.672662000 | 0.376275000  | 1.985726000  |
| 1  | -6.598625000 | 1.436729000  | 1.794314000  |
| 6  | -7.680111000 | -0.342648000 | 2.632824000  |
| 1  | -8.586349000 | 0.039035000  | 3.077554000  |

|    |              |              |              |
|----|--------------|--------------|--------------|
| 6  | -7.255998000 | -1.666534000 | 2.566539000  |
| 1  | -7.710316000 | -2.573877000 | 2.936292000  |
| 6  | -4.918380000 | -4.293298000 | -0.513480000 |
| 1  | -5.325330000 | -5.187204000 | -0.064508000 |
| 6  | -4.387197000 | -4.068913000 | -1.778356000 |
| 1  | -4.290751000 | -4.774074000 | -2.589864000 |
| 6  | -4.014955000 | -2.719366000 | -1.758536000 |
| 1  | -3.574706000 | -2.125737000 | -2.546798000 |
| 8  | 2.314643000  | 0.258782000  | -1.265212000 |
| 8  | 2.314731000  | -0.258582000 | 1.264968000  |
| 6  | 1.187614000  | 0.149779000  | -0.719203000 |
| 6  | 1.187656000  | -0.149713000 | 0.719011000  |
| 6  | -0.129953000 | 0.576805000  | -2.798467000 |
| 6  | -1.368861000 | 0.700398000  | -3.404465000 |
| 6  | -0.073835000 | 0.297260000  | -1.424516000 |
| 6  | -2.521883000 | 0.544028000  | -2.628017000 |
| 6  | -1.287224000 | 0.149447000  | -0.715572000 |
| 7  | -2.486902000 | 0.273402000  | -1.318498000 |
| 6  | -0.073723000 | -0.297481000 | 1.424376000  |
| 6  | -1.287177000 | -0.149718000 | 0.715527000  |
| 1  | 0.796837000  | 0.686990000  | -3.351821000 |
| 1  | -1.460961000 | 0.920909000  | -4.462396000 |
| 1  | -3.511073000 | 0.644850000  | -3.061597000 |
| 6  | -0.129711000 | -0.577188000 | 2.798298000  |
| 7  | -2.486825000 | -0.273723000 | 1.318523000  |
| 6  | -2.521663000 | -0.544448000 | 2.628032000  |
| 6  | -1.368575000 | -0.700917000 | 3.404362000  |
| 1  | 0.797123000  | -0.687357000 | 3.351579000  |
| 1  | -3.510795000 | -0.645238000 | 3.061746000  |
| 1  | -1.460596000 | -0.921605000 | 4.462263000  |
| 27 | 3.994934000  | -0.000054000 | -0.000071000 |
| 7  | 4.021539000  | 2.132801000  | 0.319502000  |
| 8  | 5.201904000  | 0.264260000  | -1.492199000 |
| 8  | 5.202438000  | -0.264193000 | 1.491541000  |
| 7  | 4.021560000  | -2.132877000 | -0.319405000 |
| 6  | 5.710551000  | 1.319539000  | -2.054318000 |
| 6  | 5.449973000  | 2.657634000  | -1.607891000 |
| 6  | 4.634902000  | 2.965015000  | -0.466311000 |
| 1  | 4.558653000  | 4.033638000  | -0.234031000 |
| 6  | 3.253081000  | 2.696951000  | 1.380197000  |
| 6  | 3.458409000  | 2.245512000  | 2.690597000  |
| 6  | 2.722582000  | 2.798180000  | 3.735626000  |
| 1  | 2.900671000  | 2.457722000  | 4.751935000  |
| 6  | 1.762180000  | 3.782544000  | 3.487785000  |
| 6  | 1.540300000  | 4.214237000  | 2.180636000  |
| 1  | 0.784012000  | 4.965880000  | 1.973768000  |

|   |             |              |              |
|---|-------------|--------------|--------------|
| 6 | 2.282888000 | 3.676786000  | 1.128575000  |
| 1 | 2.096799000 | 3.998451000  | 0.107812000  |
| 6 | 5.711700000 | -1.319325000 | 2.053419000  |
| 6 | 5.451105000 | -2.657480000 | 1.607218000  |
| 6 | 4.635387000 | -2.965008000 | 0.466152000  |
| 1 | 4.558987000 | -4.033651000 | 0.234029000  |
| 6 | 3.252546000 | -2.697196000 | -1.379627000 |
| 6 | 3.457380000 | -2.246130000 | -2.690233000 |
| 1 | 4.197151000 | -1.472427000 | -2.862778000 |
| 6 | 2.721022000 | -2.798958000 | -3.734796000 |
| 1 | 2.898724000 | -2.458793000 | -4.751271000 |
| 6 | 1.760581000 | -3.783121000 | -3.486286000 |
| 6 | 1.539207000 | -4.214446000 | -2.178935000 |
| 1 | 0.782915000 | -4.965942000 | -1.971545000 |
| 6 | 2.282326000 | -3.676821000 | -1.127330000 |
| 1 | 2.096655000 | -3.998213000 | -0.106403000 |
| 1 | 4.198150000 | 1.471669000  | 2.862628000  |
| 6 | 6.042485000 | 3.744095000  | -2.293453000 |
| 6 | 6.868292000 | 3.554224000  | -3.384176000 |
| 6 | 6.575766000 | -1.153755000 | 3.170612000  |
| 6 | 7.134455000 | -2.239975000 | 3.815211000  |
| 6 | 6.044202000 | -3.743808000 | 2.292492000  |
| 6 | 6.870645000 | -3.553715000 | 3.382690000  |
| 6 | 6.573971000 | 1.154209000  | -3.172063000 |
| 6 | 7.132068000 | 2.240555000  | -3.816947000 |
| 1 | 6.780373000 | -0.138386000 | 3.495423000  |
| 1 | 7.789104000 | -2.076333000 | 4.667383000  |
| 1 | 7.314536000 | -4.401382000 | 3.893982000  |
| 1 | 5.837248000 | -4.751504000 | 1.938619000  |
| 1 | 6.778564000 | 0.138893000  | -3.497048000 |
| 1 | 7.786222000 | 2.077074000  | -4.669530000 |
| 1 | 7.311713000 | 4.402009000  | -3.895676000 |
| 1 | 5.835583000 | 4.751734000  | -1.939386000 |
| 1 | 1.185120000 | -4.204970000 | -4.304892000 |
| 1 | 1.187131000 | 4.204265000  | 4.306747000  |

$LSCo^{III}\text{-}SQ\text{-}LSFe^{II}$ , **6** (R=Ph-*p*-NO<sub>2</sub>)

E= -5992.49433 a.u., E<sup>ZPE</sup>= -5991.64349 a.u.

|    |             |              |              |
|----|-------------|--------------|--------------|
| 26 | 4.053285000 | -0.000070000 | 0.000012000  |
| 7  | 4.055848000 | -1.846734000 | -0.865359000 |
| 7  | 4.565591000 | -2.131269000 | -2.094699000 |
| 7  | 5.847611000 | 0.023233000  | -2.431736000 |
| 7  | 5.509438000 | 0.625561000  | -1.255639000 |
| 7  | 5.509391000 | -0.625786000 | 1.255655000  |
| 7  | 5.847615000 | -0.023461000 | 2.431738000  |

|   |              |              |              |
|---|--------------|--------------|--------------|
| 7 | 4.565636000  | 2.131082000  | 2.094763000  |
| 7 | 4.056020000  | 1.846582000  | 0.865366000  |
| 5 | 4.970521000  | -1.048932000 | -3.136767000 |
| 1 | 3.971302000  | -0.548451000 | -3.604462000 |
| 1 | 5.635811000  | -1.578012000 | -3.991266000 |
| 5 | 4.970586000  | 1.048729000  | 3.136808000  |
| 1 | 3.971376000  | 0.548273000  | 3.604554000  |
| 1 | 5.635926000  | 1.577787000  | 3.991281000  |
| 6 | 3.692994000  | -3.023620000 | -0.321508000 |
| 1 | 3.289494000  | -3.070478000 | 0.676974000  |
| 6 | 3.958274000  | -4.077651000 | -1.200266000 |
| 1 | 3.777280000  | -5.129871000 | -1.042909000 |
| 6 | 4.515734000  | -3.461604000 | -2.312889000 |
| 1 | 4.876377000  | -3.870552000 | -3.244857000 |
| 6 | 6.988591000  | 0.567259000  | -2.905429000 |
| 1 | 7.410521000  | 0.216150000  | -3.835313000 |
| 6 | 7.416993000  | 1.548759000  | -2.021721000 |
| 1 | 8.296664000  | 2.169110000  | -2.098145000 |
| 6 | 6.461593000  | 1.540557000  | -1.000853000 |
| 1 | 6.422892000  | 2.129765000  | -0.098069000 |
| 6 | 6.461472000  | -1.540861000 | 1.000882000  |
| 1 | 6.422719000  | -2.130082000 | 0.098108000  |
| 6 | 7.416866000  | -1.549130000 | 2.021755000  |
| 1 | 8.296482000  | -2.169557000 | 2.098193000  |
| 6 | 6.988565000  | -0.567556000 | 2.905428000  |
| 1 | 7.410533000  | -0.216452000 | 3.835296000  |
| 6 | 4.515746000  | 3.461410000  | 2.312989000  |
| 1 | 4.876292000  | 3.870334000  | 3.245004000  |
| 6 | 3.958432000  | 4.077491000  | 1.200311000  |
| 1 | 3.777479000  | 5.129719000  | 1.042958000  |
| 6 | 3.693232000  | 3.023484000  | 0.321503000  |
| 1 | 3.289840000  | 3.070363000  | -0.677022000 |
| 8 | -2.286128000 | -0.604710000 | 1.154643000  |
| 8 | -2.286101000 | 0.604668000  | -1.154735000 |
| 6 | -1.137324000 | -0.328968000 | 0.639913000  |
| 6 | -1.137307000 | 0.328880000  | -0.640002000 |
| 6 | 0.182947000  | -1.321445000 | 2.530504000  |
| 6 | 1.433565000  | -1.613123000 | 3.047381000  |
| 6 | 0.108148000  | -0.664759000 | 1.290300000  |
| 6 | 2.583211000  | -1.238452000 | 2.341009000  |
| 6 | 1.315481000  | -0.326793000 | 0.641475000  |
| 7 | 2.537561000  | -0.597369000 | 1.164544000  |
| 6 | 0.108180000  | 0.664652000  | -1.290370000 |
| 6 | 1.315497000  | 0.326688000  | -0.641511000 |
| 1 | -0.729596000 | -1.591734000 | 3.050758000  |
| 1 | 1.543377000  | -2.125757000 | 3.996740000  |



|    |              |              |              |
|----|--------------|--------------|--------------|
| 1  | 3.570826000  | -1.461950000 | 2.721289000  |
| 6  | 0.183015000  | 1.321363000  | -2.530557000 |
| 7  | 2.537590000  | 0.597299000  | -1.164528000 |
| 6  | 2.583272000  | 1.238405000  | -2.340978000 |
| 6  | 1.433646000  | 1.613071000  | -3.047385000 |
| 1  | -0.729512000 | 1.591649000  | -3.050841000 |
| 1  | 3.570898000  | 1.461927000  | -2.721217000 |
| 1  | 1.543481000  | 2.125725000  | -3.996730000 |
| 27 | -3.734650000 | 0.000117000  | -0.000001000 |
| 7  | -3.726722000 | -1.680605000 | -1.042159000 |
| 8  | -5.041985000 | 0.828847000  | -1.069604000 |
| 8  | -5.042089000 | -0.828362000 | 1.069688000  |
| 7  | -3.726360000 | 1.680835000  | 1.042165000  |
| 6  | -5.609317000 | 0.368510000  | -2.145464000 |
| 6  | -5.336955000 | -0.912712000 | -2.719391000 |
| 6  | -4.431290000 | -1.836991000 | -2.126561000 |
| 1  | -4.346325000 | -2.802215000 | -2.632717000 |
| 6  | -2.898309000 | -2.771554000 | -0.644256000 |
| 6  | -3.081265000 | -3.359516000 | 0.615250000  |
| 6  | -2.284562000 | -4.427878000 | 1.002660000  |
| 1  | -2.413744000 | -4.907983000 | 1.965193000  |
| 6  | -1.300456000 | -4.892415000 | 0.129843000  |
| 6  | -1.096866000 | -4.319589000 | -1.121292000 |
| 1  | -0.314436000 | -4.700373000 | -1.766604000 |
| 6  | -1.901515000 | -3.250932000 | -1.505136000 |
| 1  | -1.744952000 | -2.772551000 | -2.466761000 |
| 6  | -5.609218000 | -0.367960000 | 2.145617000  |
| 6  | -5.336532000 | 0.913189000  | 2.719572000  |
| 6  | -4.430758000 | 1.837309000  | 2.126667000  |
| 1  | -4.345546000 | 2.802500000  | 2.632844000  |
| 6  | -2.897786000 | 2.771629000  | 0.644198000  |
| 6  | -3.080766000 | 3.359663000  | -0.615272000 |
| 1  | -3.850211000 | 2.965270000  | -1.267709000 |
| 6  | -2.283874000 | 4.427855000  | -1.002759000 |
| 1  | -2.413048000 | 4.907987000  | -1.965280000 |
| 6  | -1.299577000 | 4.892179000  | -0.130042000 |
| 6  | -1.095972000 | 4.319296000  | 1.121063000  |
| 1  | -0.313403000 | 4.699914000  | 1.766305000  |
| 6  | -1.900789000 | 3.250786000  | 1.504971000  |
| 1  | -1.744202000 | 2.772345000  | 2.466562000  |
| 1  | -3.850550000 | -2.964944000 | 1.267768000  |
| 6  | -6.009914000 | -1.309151000 | -3.905039000 |
| 6  | -6.921982000 | -0.485955000 | -4.525491000 |
| 6  | -6.565379000 | -1.192108000 | 2.800757000  |
| 6  | -7.194458000 | -0.774703000 | 3.955181000  |
| 6  | -6.009278000 | 1.309720000  | 3.905307000  |

|   |              |              |              |
|---|--------------|--------------|--------------|
| 6 | -6.921449000 | 0.486688000  | 4.525828000  |
| 6 | -6.565374000 | 1.192837000  | -2.800531000 |
| 6 | -7.194668000 | 0.775519000  | -3.954867000 |
| 1 | -6.783795000 | -2.158134000 | 2.357176000  |
| 1 | -7.918543000 | -1.431409000 | 4.430429000  |
| 1 | -7.426400000 | 0.801338000  | 5.432546000  |
| 1 | -5.788325000 | 2.290470000  | 4.320243000  |
| 1 | -6.783538000 | 2.158924000  | -2.356957000 |
| 1 | -7.918671000 | 1.432352000  | -4.430063000 |
| 1 | -7.427094000 | -0.800535000 | -5.432144000 |
| 1 | -5.789206000 | -2.289963000 | -4.319960000 |
| 7 | -0.441946000 | 6.019776000  | -0.549404000 |
| 8 | 0.374877000  | 6.448744000  | 0.261384000  |
| 8 | -0.593603000 | 6.458705000  | -1.687189000 |
| 7 | -0.443027000 | -6.020202000 | 0.549118000  |
| 8 | -0.594952000 | -6.459370000 | 1.686774000  |
| 8 | 0.373898000  | -6.449082000 | -0.261614000 |

$LS\text{Co}^{\text{III}}\text{-SQ-}_{\text{HS}}\text{Fe}^{\text{II}}$ , **6** (R=Ph-*p*-NO<sub>2</sub>)

E= -5992.48834 a.u., E<sup>ZPE</sup>= -5991.64169 a.u.

|    |             |              |              |
|----|-------------|--------------|--------------|
| 26 | 4.227818000 | 0.038566000  | 0.002400000  |
| 7  | 4.267326000 | 2.044927000  | 0.922434000  |
| 7  | 4.859892000 | 2.326835000  | 2.114955000  |
| 7  | 6.069049000 | 0.116240000  | 2.531729000  |
| 7  | 5.661718000 | -0.619507000 | 1.456747000  |
| 7  | 5.635162000 | 0.647474000  | -1.499845000 |
| 7  | 5.984695000 | -0.103630000 | -2.584582000 |
| 7  | 4.715105000 | -2.273967000 | -2.132126000 |
| 7  | 4.178263000 | -1.974442000 | -0.917829000 |
| 5  | 5.192035000 | 1.232419000  | 3.177345000  |
| 1  | 4.158890000 | 0.749503000  | 3.584468000  |
| 1  | 5.832664000 | 1.747253000  | 4.058095000  |
| 5  | 5.052600000 | -1.190313000 | -3.203350000 |
| 1  | 4.025341000 | -0.673014000 | -3.582838000 |
| 1  | 5.650770000 | -1.725504000 | -4.101726000 |
| 6  | 3.951897000 | 3.225985000  | 0.361188000  |
| 1  | 3.481346000 | 3.262113000  | -0.610440000 |
| 6  | 4.335223000 | 4.284663000  | 1.190344000  |
| 1  | 4.214933000 | 5.342647000  | 1.014365000  |
| 6  | 4.907326000 | 3.662379000  | 2.294657000  |
| 1  | 5.333722000 | 4.074644000  | 3.197139000  |
| 6  | 7.240195000 | -0.366539000 | 2.986477000  |
| 1  | 7.716838000 | 0.084279000  | 3.844372000  |
| 6  | 7.623515000 | -1.445022000 | 2.193898000  |
| 1  | 8.511795000 | -2.050550000 | 2.288080000  |

|    |              |              |              |
|----|--------------|--------------|--------------|
| 6  | 6.604517000  | -1.559311000 | 1.247173000  |
| 1  | 6.501123000  | -2.255629000 | 0.428014000  |
| 6  | 6.614673000  | 1.555773000  | -1.321895000 |
| 1  | 6.560580000  | 2.256690000  | -0.501866000 |
| 6  | 7.599710000  | 1.405923000  | -2.299171000 |
| 1  | 8.504259000  | 1.981473000  | -2.422029000 |
| 6  | 7.156728000  | 0.339229000  | -3.076257000 |
| 1  | 7.591599000  | -0.129132000 | -3.946801000 |
| 6  | 4.702257000  | -3.609858000 | -2.318016000 |
| 1  | 5.079962000  | -4.034436000 | -3.236372000 |
| 6  | 4.145693000  | -4.214136000 | -1.196112000 |
| 1  | 3.987034000  | -5.266893000 | -1.018990000 |
| 6  | 3.836377000  | -3.144737000 | -0.349712000 |
| 1  | 3.403181000  | -3.167386000 | 0.639497000  |
| 8  | -2.370170000 | -0.589297000 | 1.177197000  |
| 8  | -2.380695000 | 0.595735000  | -1.149882000 |
| 6  | -1.221058000 | -0.299385000 | 0.656648000  |
| 6  | -1.226591000 | 0.339483000  | -0.622672000 |
| 6  | 0.089057000  | -1.239945000 | 2.563690000  |
| 6  | 1.325390000  | -1.514897000 | 3.118174000  |
| 6  | 0.026809000  | -0.609683000 | 1.307480000  |
| 6  | 2.483471000  | -1.158256000 | 2.412770000  |
| 6  | 1.248098000  | -0.280638000 | 0.664871000  |
| 7  | 2.449448000  | -0.558880000 | 1.221426000  |
| 6  | 0.016294000  | 0.678682000  | -1.269203000 |
| 6  | 1.242832000  | 0.368597000  | -0.626932000 |
| 1  | -0.834417000 | -1.498509000 | 3.071275000  |
| 1  | 1.415765000  | -1.998012000 | 4.084905000  |
| 1  | 3.470196000  | -1.355444000 | 2.817368000  |
| 6  | 0.068684000  | 1.313362000  | -2.523617000 |
| 7  | 2.439747000  | 0.663555000  | -1.184234000 |
| 6  | 2.464123000  | 1.266736000  | -2.373962000 |
| 6  | 1.300627000  | 1.610309000  | -3.076697000 |
| 1  | -0.858636000 | 1.558172000  | -3.031094000 |
| 1  | 3.447963000  | 1.476049000  | -2.779696000 |
| 1  | 1.383306000  | 2.097936000  | -4.041851000 |
| 27 | -3.815008000 | -0.036928000 | 0.001755000  |
| 7  | -3.750117000 | -1.730510000 | -1.020819000 |
| 8  | -5.142165000 | 0.738037000  | -1.090399000 |
| 8  | -5.110158000 | -0.891493000 | 1.072019000  |
| 7  | -3.867194000 | 1.656235000  | 1.022549000  |
| 6  | -5.671786000 | 0.256019000  | -2.174509000 |
| 6  | -5.349656000 | -1.020494000 | -2.734264000 |
| 6  | -4.430748000 | -1.914631000 | -2.116220000 |
| 1  | -4.312417000 | -2.881932000 | -2.611758000 |
| 6  | -2.900118000 | -2.794851000 | -0.600357000 |

|   |              |              |              |
|---|--------------|--------------|--------------|
| 6 | -3.074923000 | -3.364555000 | 0.668913000  |
| 6 | -2.256081000 | -4.407409000 | 1.078636000  |
| 1 | -2.378785000 | -4.872785000 | 2.049212000  |
| 6 | -1.257379000 | -4.865269000 | 0.218616000  |
| 6 | -1.061795000 | -4.310582000 | -1.042153000 |
| 1 | -0.268303000 | -4.685043000 | -1.677598000 |
| 6 | -1.888461000 | -3.267414000 | -1.448034000 |
| 1 | -1.737283000 | -2.801858000 | -2.416740000 |
| 6 | -5.680113000 | -0.444881000 | 2.150671000  |
| 6 | -5.442715000 | 0.848031000  | 2.715224000  |
| 6 | -4.573008000 | 1.797499000  | 2.108588000  |
| 1 | -4.522330000 | 2.770497000  | 2.604347000  |
| 6 | -3.083369000 | 2.773751000  | 0.611654000  |
| 6 | -3.271507000 | 3.324352000  | -0.664154000 |
| 1 | -4.008350000 | 2.877977000  | -1.320402000 |
| 6 | -2.525493000 | 4.425450000  | -1.060164000 |
| 1 | -2.662863000 | 4.878323000  | -2.034665000 |
| 6 | -1.584483000 | 4.960930000  | -0.180316000 |
| 6 | -1.375305000 | 4.425682000  | 1.086693000  |
| 1 | -0.628457000 | 4.862535000  | 1.738587000  |
| 6 | -2.128663000 | 3.323618000  | 1.478737000  |
| 1 | -1.964960000 | 2.874715000  | 2.453250000  |
| 1 | -3.855714000 | -2.975482000 | 1.310774000  |
| 6 | -5.986423000 | -1.444429000 | -3.930382000 |
| 6 | -6.909587000 | -0.653095000 | -4.575434000 |
| 6 | -6.605593000 | -1.293996000 | 2.819272000  |
| 6 | -7.238222000 | -0.889109000 | 3.975942000  |
| 6 | -6.118902000 | 1.230935000  | 3.903505000  |
| 6 | -7.000000000 | 0.383992000  | 4.536664000  |
| 6 | -6.639116000 | 1.046674000  | -2.855402000 |
| 6 | -7.231667000 | 0.603386000  | -4.019258000 |
| 1 | -6.797807000 | -2.268895000 | 2.382906000  |
| 1 | -7.937944000 | -1.564811000 | 4.461067000  |
| 1 | -7.507424000 | 0.688699000  | 5.445436000  |
| 1 | -5.925858000 | 2.220997000  | 4.310330000  |
| 1 | -6.895297000 | 2.008469000  | -2.422863000 |
| 1 | -7.965134000 | 1.235062000  | -4.513763000 |
| 1 | -7.386387000 | -0.988640000 | -5.489903000 |
| 1 | -5.728491000 | -2.421041000 | -4.333764000 |
| 7 | -0.783630000 | 6.125929000  | -0.606781000 |
| 8 | 0.001403000  | 6.608643000  | 0.205655000  |
| 8 | -0.946319000 | 6.542058000  | -1.751857000 |
| 7 | -0.376191000 | -5.964167000 | 0.661804000  |
| 8 | -0.522362000 | -6.386499000 | 1.806893000  |
| 8 | 0.455096000  | -6.388657000 | -0.137084000 |

$\text{HS-Co}^{\text{II}}\text{-SQ-}_{\text{LS}}\text{Fe}^{\text{III}}$ , **6** (R=Ph-*p*-NO<sub>2</sub>)

E= -5992.47886 a.u., E<sup>ZPE</sup>= -5991.63174 a.u.

|    |              |              |              |
|----|--------------|--------------|--------------|
| 26 | 4.142806000  | 0.000042000  | -0.000196000 |
| 7  | 4.064734000  | 1.900266000  | 0.666284000  |
| 7  | 4.683630000  | 2.366324000  | 1.785526000  |
| 7  | 6.015986000  | 0.274986000  | 2.301287000  |
| 7  | 5.560388000  | -0.503947000 | 1.277189000  |
| 7  | 5.560239000  | 0.503936000  | -1.277768000 |
| 7  | 6.015570000  | -0.274975000 | -2.302001000 |
| 7  | 4.683220000  | -2.366262000 | -1.786000000 |
| 7  | 4.064520000  | -1.900186000 | -0.666658000 |
| 5  | 5.222890000  | 1.461702000  | 2.930148000  |
| 1  | 4.298378000  | 1.040783000  | 3.582867000  |
| 1  | 5.989767000  | 2.106066000  | 3.595489000  |
| 5  | 5.222303000  | -1.461657000 | -2.930718000 |
| 1  | 4.297686000  | -1.040697000 | -3.583262000 |
| 1  | 5.989028000  | -2.106047000 | -3.596208000 |
| 6  | 3.516317000  | 2.967174000  | 0.047267000  |
| 1  | 2.992389000  | 2.862702000  | -0.887949000 |
| 6  | 3.770294000  | 4.130276000  | 0.771684000  |
| 1  | 3.445285000  | 5.130989000  | 0.531386000  |
| 6  | 4.513987000  | 3.701741000  | 1.863585000  |
| 1  | 4.921288000  | 4.247223000  | 2.701841000  |
| 6  | 7.155479000  | -0.251455000 | 2.778695000  |
| 1  | 7.661403000  | 0.221043000  | 3.607526000  |
| 6  | 7.467773000  | -1.400727000 | 2.054844000  |
| 1  | 8.315708000  | -2.054374000 | 2.187354000  |
| 6  | 6.447553000  | -1.514016000 | 1.118498000  |
| 1  | 6.309291000  | -2.250137000 | 0.343169000  |
| 6  | 6.447502000  | 1.513939000  | -1.119209000 |
| 1  | 6.309441000  | 2.250030000  | -0.343816000 |
| 6  | 7.467522000  | 1.400627000  | -2.055769000 |
| 1  | 8.315475000  | 2.054222000  | -2.188419000 |
| 6  | 7.155004000  | 0.251410000  | -2.779611000 |
| 1  | 7.660733000  | -0.221086000 | -3.608562000 |
| 6  | 4.513545000  | -3.701677000 | -1.864020000 |
| 1  | 4.920694000  | -4.247173000 | -2.702341000 |
| 6  | 3.770032000  | -4.130193000 | -0.771988000 |
| 1  | 3.445046000  | -5.130899000 | -0.531627000 |
| 6  | 3.516196000  | -2.967081000 | -0.047537000 |
| 1  | 2.992430000  | -2.862590000 | 0.887768000  |
| 8  | -2.199461000 | -0.461328000 | 1.226692000  |
| 8  | -2.199608000 | 0.461339000  | -1.226375000 |
| 6  | -1.073365000 | -0.240753000 | 0.682852000  |
| 6  | -1.073445000 | 0.240816000  | -0.682648000 |

|    |              |              |              |
|----|--------------|--------------|--------------|
| 6  | 0.271978000  | -0.917327000 | 2.693622000  |
| 6  | 1.515823000  | -1.114220000 | 3.262074000  |
| 6  | 0.185906000  | -0.459758000 | 1.364745000  |
| 6  | 2.674499000  | -0.851454000 | 2.513734000  |
| 6  | 1.398964000  | -0.222079000 | 0.678109000  |
| 7  | 2.615999000  | -0.411431000 | 1.255335000  |
| 6  | 0.185747000  | 0.459871000  | -1.364670000 |
| 6  | 1.398885000  | 0.222203000  | -0.678171000 |
| 1  | -0.645907000 | -1.111397000 | 3.239145000  |
| 1  | 1.620414000  | -1.472408000 | 4.280140000  |
| 1  | 3.659532000  | -1.005666000 | 2.931585000  |
| 6  | 0.271664000  | 0.917476000  | -2.693545000 |
| 7  | 2.615854000  | 0.411579000  | -1.255528000 |
| 6  | 2.674206000  | 0.851648000  | -2.513919000 |
| 6  | 1.515443000  | 1.114416000  | -3.262124000 |
| 1  | -0.646283000 | 1.111538000  | -3.238965000 |
| 1  | 3.659190000  | 1.005892000  | -2.931873000 |
| 1  | 1.619915000  | 1.472635000  | -4.280191000 |
| 27 | -3.885029000 | -0.000046000 | 0.000218000  |
| 7  | -3.959762000 | -1.971327000 | -0.926806000 |
| 8  | -5.103033000 | 0.632681000  | -1.422947000 |
| 8  | -5.102915000 | -0.632834000 | 1.423431000  |
| 7  | -3.959842000 | 1.971205000  | 0.927240000  |
| 6  | -5.772714000 | 0.012418000  | -2.337277000 |
| 6  | -5.613807000 | -1.387262000 | -2.643656000 |
| 6  | -4.703149000 | -2.251296000 | -1.959340000 |
| 1  | -4.660544000 | -3.274098000 | -2.355125000 |
| 6  | -3.059244000 | -2.949026000 | -0.470506000 |
| 6  | -3.029698000 | -3.271205000 | 0.899655000  |
| 6  | -2.092049000 | -4.167213000 | 1.386764000  |
| 1  | -2.056329000 | -4.428570000 | 2.437550000  |
| 6  | -1.160277000 | -4.728303000 | 0.507076000  |
| 6  | -1.179514000 | -4.438726000 | -0.856727000 |
| 1  | -0.441912000 | -4.888924000 | -1.509999000 |
| 6  | -2.133681000 | -3.553913000 | -1.341514000 |
| 1  | -2.139862000 | -3.287565000 | -2.393705000 |
| 6  | -5.772611000 | -0.012621000 | 2.337788000  |
| 6  | -5.613779000 | 1.387067000  | 2.644161000  |
| 6  | -4.703212000 | 2.251154000  | 1.959788000  |
| 1  | -4.660686000 | 3.273978000  | 2.355527000  |
| 6  | -3.059441000 | 2.948969000  | 0.470848000  |
| 6  | -3.029984000 | 3.271065000  | -0.899335000 |
| 1  | -3.743098000 | 2.785851000  | -1.556879000 |
| 6  | -2.092456000 | 4.167147000  | -1.386537000 |
| 1  | -2.056810000 | 4.428447000  | -2.437340000 |
| 6  | -1.160709000 | 4.728394000  | -0.506923000 |

|   |              |              |              |
|---|--------------|--------------|--------------|
| 6 | -1.179858000 | 4.438898000  | 0.856899000  |
| 1 | -0.442279000 | 4.889218000  | 1.510113000  |
| 6 | -2.133910000 | 3.554013000  | 1.341781000  |
| 1 | -2.140018000 | 3.287731000  | 2.393989000  |
| 1 | -3.742838000 | -2.786111000 | 1.557259000  |
| 6 | -6.382955000 | -1.964419000 | -3.687824000 |
| 6 | -7.290756000 | -1.230399000 | -4.419316000 |
| 6 | -6.721391000 | -0.740587000 | 3.116909000  |
| 6 | -7.452966000 | -0.139233000 | 4.118555000  |
| 6 | -6.382925000 | 1.964176000  | 3.688356000  |
| 6 | -7.290655000 | 1.230097000  | 4.419878000  |
| 6 | -6.721553000 | 0.740327000  | -3.116384000 |
| 6 | -7.453129000 | 0.138926000  | -4.118000000 |
| 1 | -6.847044000 | -1.793103000 | 2.881747000  |
| 1 | -8.167984000 | -0.730921000 | 4.685284000  |
| 1 | -7.871037000 | 1.693557000  | 5.210744000  |
| 1 | -6.243011000 | 3.021834000  | 3.903681000  |
| 1 | -6.847252000 | 1.792839000  | -2.881229000 |
| 1 | -8.168193000 | 0.730573000  | -4.684713000 |
| 1 | -7.871143000 | -1.693899000 | -5.210154000 |
| 1 | -6.242988000 | -3.022071000 | -3.903146000 |
| 7 | -0.113528000 | 5.607634000  | -1.034650000 |
| 8 | 0.731035000  | 6.042993000  | -0.246245000 |
| 8 | -0.115118000 | 5.852823000  | -2.241722000 |
| 7 | -0.112973000 | -5.607458000 | 1.034702000  |
| 8 | -0.114458000 | -5.852687000 | 2.241766000  |
| 8 | 0.731585000  | -6.042700000 | 0.246228000  |

$\text{HS-Co}^{\text{II}}\text{-BQ-HS-Fe}^{\text{II}}$ , **6** (R=Ph-*p*-NO<sub>2</sub>)

E= -5992.47081 a.u., E<sup>ZPE</sup>= -5991.62821 a.u.

|    |              |              |              |
|----|--------------|--------------|--------------|
| 26 | -4.362715000 | -0.133578000 | 0.009315000  |
| 7  | -4.281777000 | 1.822992000  | -1.004061000 |
| 7  | -4.783201000 | 2.059043000  | -2.247969000 |
| 7  | -6.050581000 | -0.126631000 | -2.615705000 |
| 7  | -5.733033000 | -0.817723000 | -1.481755000 |
| 7  | -5.805043000 | 0.605310000  | 1.399966000  |
| 7  | -6.220862000 | -0.061761000 | 2.516241000  |
| 7  | -5.023871000 | -2.297063000 | 2.226991000  |
| 7  | -4.418701000 | -2.082601000 | 1.026093000  |
| 5  | -5.096552000 | 0.920832000  | -3.267901000 |
| 1  | -4.061305000 | 0.379495000  | -3.588097000 |
| 1  | -5.665572000 | 1.407018000  | -4.210810000 |
| 5  | -5.354084000 | -1.145593000 | 3.227797000  |
| 1  | -4.318711000 | -0.647740000 | 3.611037000  |
| 1  | -6.000892000 | -1.606770000 | 4.132193000  |

|   |              |              |              |
|---|--------------|--------------|--------------|
| 6 | -3.949554000 | 3.021859000  | -0.490174000 |
| 1 | -3.544844000 | 3.099453000  | 0.508086000  |
| 6 | -4.228889000 | 4.044266000  | -1.400853000 |
| 1 | -4.067528000 | 5.103880000  | -1.274898000 |
| 6 | -4.757541000 | 3.382606000  | -2.504092000 |
| 1 | -5.107332000 | 3.759118000  | -3.453936000 |
| 6 | -7.213226000 | -0.589683000 | -3.109723000 |
| 1 | -7.623656000 | -0.169237000 | -4.015889000 |
| 6 | -7.683325000 | -1.607775000 | -2.284252000 |
| 1 | -8.588831000 | -2.183784000 | -2.396932000 |
| 6 | -6.724307000 | -1.708617000 | -1.276417000 |
| 1 | -6.696228000 | -2.362045000 | -0.416934000 |
| 6 | -6.741590000 | 1.536885000  | 1.129413000  |
| 1 | -6.630436000 | 2.181295000  | 0.269910000  |
| 6 | -7.763687000 | 1.486170000  | 2.077119000  |
| 1 | -8.648056000 | 2.102100000  | 2.131350000  |
| 6 | -7.389935000 | 0.455454000  | 2.935714000  |
| 1 | -7.872479000 | 0.060869000  | 3.817697000  |
| 6 | -5.086411000 | -3.620430000 | 2.473973000  |
| 1 | -5.523653000 | -3.982050000 | 3.392811000  |
| 6 | -4.512035000 | -4.304421000 | 1.407556000  |
| 1 | -4.402037000 | -5.371233000 | 1.287500000  |
| 6 | -4.110941000 | -3.294705000 | 0.528745000  |
| 1 | -3.631703000 | -3.386929000 | -0.434844000 |
| 8 | 2.243813000  | -0.669407000 | -1.068074000 |
| 8 | 2.200076000  | 0.615039000  | 1.206585000  |
| 6 | 1.122312000  | -0.434823000 | -0.575118000 |
| 6 | 1.097857000  | 0.289729000  | 0.722902000  |
| 6 | -0.174181000 | -1.524925000 | -2.410550000 |
| 6 | -1.402580000 | -1.866858000 | -2.950879000 |
| 6 | -0.136516000 | -0.821778000 | -1.197346000 |
| 6 | -2.566746000 | -1.491749000 | -2.272142000 |
| 6 | -1.360260000 | -0.490508000 | -0.572774000 |
| 7 | -2.551100000 | -0.822973000 | -1.113863000 |
| 6 | -0.183571000 | 0.606415000  | 1.338433000  |
| 6 | -1.383811000 | 0.229602000  | 0.695158000  |
| 1 | 0.760215000  | -1.787422000 | -2.896284000 |
| 1 | -1.477840000 | -2.411132000 | -3.885630000 |
| 1 | -3.548745000 | -1.729275000 | -2.666571000 |
| 6 | -0.265989000 | 1.299224000  | 2.555292000  |
| 7 | -2.594353000 | 0.522777000  | 1.215027000  |
| 6 | -2.653144000 | 1.186388000  | 2.374908000  |
| 6 | -1.514360000 | 1.592538000  | 3.078240000  |
| 1 | 0.650206000  | 1.593032000  | 3.057192000  |
| 1 | -3.649090000 | 1.396127000  | 2.749134000  |
| 1 | -1.624227000 | 2.128514000  | 4.014337000  |



|    |             |              |              |
|----|-------------|--------------|--------------|
| 27 | 3.974240000 | 0.170124000  | 0.006025000  |
| 7  | 3.752721000 | 1.977921000  | -1.136773000 |
| 8  | 5.192464000 | -0.504338000 | -1.377512000 |
| 8  | 5.069782000 | 1.063506000  | 1.360450000  |
| 7  | 4.249066000 | -1.681290000 | 1.126150000  |
| 6  | 5.663248000 | 0.027698000  | -2.461366000 |
| 6  | 5.278335000 | 1.325375000  | -2.949331000 |
| 6  | 4.357912000 | 2.184386000  | -2.274622000 |
| 1  | 4.175280000 | 3.141231000  | -2.777993000 |
| 6  | 2.850373000 | 2.971303000  | -0.692890000 |
| 6  | 2.961785000 | 3.456860000  | 0.621842000  |
| 6  | 2.062264000 | 4.399187000  | 1.096434000  |
| 1  | 2.137558000 | 4.792860000  | 2.103029000  |
| 6  | 1.035921000 | 4.844685000  | 0.259863000  |
| 6  | 0.904560000 | 4.380479000  | -1.046590000 |
| 1  | 0.091618000 | 4.741855000  | -1.664975000 |
| 6  | 1.815481000 | 3.442446000  | -1.519769000 |
| 1  | 1.709469000 | 3.047023000  | -2.525193000 |
| 6  | 5.724430000 | 0.643450000  | 2.396632000  |
| 6  | 5.684616000 | -0.714829000 | 2.868959000  |
| 6  | 4.952118000 | -1.759693000 | 2.219098000  |
| 1  | 5.034365000 | -2.740531000 | 2.703009000  |
| 6  | 3.581993000 | -2.851628000 | 0.699510000  |
| 6  | 3.708031000 | -3.259673000 | -0.639924000 |
| 1  | 4.336757000 | -2.671696000 | -1.299437000 |
| 6  | 3.041314000 | -4.389026000 | -1.091216000 |
| 1  | 3.136527000 | -4.727216000 | -2.116085000 |
| 6  | 2.230177000 | -5.101738000 | -0.206191000 |
| 6  | 2.084423000 | -4.715124000 | 1.124333000  |
| 1  | 1.439580000 | -5.287051000 | 1.780806000  |
| 6  | 2.762207000 | -3.587944000 | 1.573474000  |
| 1  | 2.634273000 | -3.254531000 | 2.598589000  |
| 1  | 3.757536000 | 3.069058000  | 1.248627000  |
| 6  | 5.840833000 | 1.809027000  | -4.160212000 |
| 6  | 6.750680000 | 1.072671000  | -4.886181000 |
| 6  | 6.527579000 | 1.565409000  | 3.127102000  |
| 6  | 7.229624000 | 1.179821000  | 4.250435000  |
| 6  | 6.421457000 | -1.069555000 | 4.026685000  |
| 6  | 7.181824000 | -0.149533000 | 4.717745000  |
| 6  | 6.612367000 | -0.702812000 | -3.232968000 |
| 6  | 7.134947000 | -0.196576000 | -4.404495000 |
| 1  | 6.566908000 | 2.586740000  | 2.761255000  |
| 1  | 7.831340000 | 1.913206000  | 4.781292000  |
| 1  | 7.738255000 | -0.443086000 | 5.601489000  |
| 1  | 6.380096000 | -2.102217000 | 4.366784000  |
| 1  | 6.911901000 | -1.676374000 | -2.857334000 |

|   |              |              |              |
|---|--------------|--------------|--------------|
| 1 | 7.857081000  | -0.785715000 | -4.964251000 |
| 1 | 7.168658000  | 1.461385000  | -5.808662000 |
| 1 | 5.536887000  | 2.793069000  | -4.511276000 |
| 7 | 1.498181000  | -6.282241000 | -0.693544000 |
| 8 | 0.824868000  | -6.916973000 | 0.117117000  |
| 8 | 1.594501000  | -6.564522000 | -1.887418000 |
| 7 | 0.053780000  | 5.810162000  | 0.778477000  |
| 8 | 0.148262000  | 6.147351000  | 1.958307000  |
| 8 | -0.814650000 | 6.218537000  | 0.008259000  |
